# Supplementary material for: RSPO2 and RANKL signal through LGR4 to regulate osteoclastic premetastatic niche formation and bone metastasis
Source: PubMed Central journal article supplement (PMC8759794; doi:10.1172/jci144579), 2022-01-18
Supplement: jci-132-144579-s082.pdf [file jci-132-144579-s082.pdf]

**Supplemental Figure. 1 Conditioned medium of breast cancer (BCa) cells promoted osteoclast precursor (OP) recruitment and osteoclastic pre-metastatic niche formation.**

(A) Experimental design of the pre-metastatic niche mouse model. MDA231 cell conditioned medium was collected and i.p. injected into nude mice every day. After 2, 3, or 4 weeks, the mice were euthanized, skeletons were collected and subjected to histological analysis. i.p. injection of the cell culture blank medium into nude mice every day for 4 weeks served as the control group (Ctrl).

(B and C) (B) Representative images of IF double staining for RANK (green) and CD115 (red) and TRAP staining in the 3rd lumbar vertebrae (L3 spine) of tumor-free mice and (C) quantitative analysis. White arrow indicate cells double positive for RANK and CD115. Error bars are mean  $\pm$  SD. \* $P < 0.05$ , \*\* $P < 0.01$ , one-way ANOVA with Tukey's post hoc test.  $n = 3$  per group. Scale bars, 10  $\mu\text{m}$ /5  $\mu\text{m}$  (top/bottom, IF), 50  $\mu\text{m}$  (TRAP).

(D-G) Representative images of IF double staining for RANK (green) and CD115 (red) and TRAP staining in the (D) tibiae, (E) L3 spines, (F) pelvis, (G) skull of tumor-free mice and quantitative analysis. White arrow indicate cells double positive for RANK and CD115. Error bars are mean  $\pm$  SD. \* $P < 0.05$ , \*\* $P < 0.01$ , unpaired two-tailed Student's  $t$  test.  $n = 5$  per group. Scale bars, 10  $\mu\text{m}$ /5  $\mu\text{m}$  (left/right, IF in D-G), 50  $\mu\text{m}$  (TRAP in D and E), 25  $\mu\text{m}$  (TRAP in F and G). N.oc/B.pm, Osteoclast Number/Bone Perimeter; Oc.S/BS, Osteoclast Surface/Bone Surface; ES/BS, Eroded Surface/Bone Surface.

**Supplemental Figure 2 Conditioned medium of BCa cells promoted bone metastasis by recruitment of OPs and formation of an osteoclastic pre-metastatic niche.**

(A) Representative images of MDA231 cells which have migrated through the top chamber of the Transwell system in the presence of the indicated numbers of primary cultured OPs (bottom chamber), with quantification of the number of migrated cells. Error bars are mean  $\pm$  SD. \* $P < 0.05$ , \*\*\* $P < 0.001$ , one-way ANOVA followed by Dunnett's post hoc test.  $n = 3$  biological replicates. Scale bars, 20  $\mu\text{m}$ .

(B-E) Mice of subject to 3 weeks pre-treatment of conditioned or control medium were analyzed 42 days after SCP46-luc cell i.c. injection (tumor-bearing mice). (B) Representative images of bioluminescent, radiographic, H&E, TRAP, IF double staining for RANK (green) and CD115 (red) in the tibias of mice and (C-E) quantitative analysis. Yellow arrows indicate osteolytic lesion areas, red dotted lines indicate tumor zone, white arrow indicate cells double positive for RANK and CD115. Error bars are mean  $\pm$  SD. \* $P < 0.05$ , \*\* $P < 0.01$ , (C) two-way ANOVA, (D) log-rank test, (E) unpaired two-tailed Student's  $t$  test.  $n = 6$  per group. Scale bars, 1 mm (micro-CT), 25  $\mu\text{m}$  (H&E), 50  $\mu\text{m}$  (TRAP), 10  $\mu\text{m}/5 \mu\text{m}$  (left/right, IF). T, tumor; B, bone.

(F and G) (F) Representative images of radiographic, H&E, TRAP, IF double staining for RANK (green) and CD115 (red) in the L3 spines of mice and (G) quantitative analysis. Yellow arrows indicate osteolytic lesion areas, red dotted lines indicate tumor zone, white arrow indicate cells double positive for RANK and CD115. Error bars are

mean  $\pm$  SD. \* $P$  < 0.05, \*\* $P$  < 0.01, unpaired two-tailed Student's  $t$  test.  $n$  = 6 per group.

Scale bars, 1 mm (micro-CT), 25  $\mu$ m (H&E), 50  $\mu$ m (TRAP), 10  $\mu$ m/5  $\mu$ m (left/right, IF).

**(H-K)** Representative images of H&E staining in the **(H)** pelvic, **(J)** skull of tumor-bearing mice and **(I and K)** quantitative analysis. Error bars are mean  $\pm$  SD, unpaired two-tailed Student's  $t$  test.  $n$  = 6 per group. Scale bars, 25  $\mu$ m.

**(L)** Representative images of IF staining in mice. Mouse-RANK positive for OPs/osteoclasts, human-VIMENTIN positive for MDA231 cells. Pearson's correlation analysis.  $n$  = 8 biological replicates. Scale bars, 50  $\mu$ m.

### **Supplemental Figure 3 R-spondin 2 (RSPO2) or RANKL promoted OP recruitment by BCa cells.**

**(A)** Representative images of RAW264.7 cells subjected to the Transwell migration assay (top chamber) with RSPO2 (200 ng/mL) or RANKL (200 ng/mL) or 7 $\alpha$ ,25-OHC (100 nM) in the bottom chamber, with quantification of the number of migrated cells.

Error bars are mean  $\pm$  SD. \*\* $P$  < 0.01, one-way ANOVA followed by Dunnett's post hoc test.  $n$  = 3 biological replicates, Scale bars, 20  $\mu$ m.

**(B)** Representative images of primary cultured OPs subjected to the migration assay (top chamber) with conditioned medium from three different breast cancer cell lines (MCF-7, 4T1, AT3 cells) stimulated with RSPO2 (200 ng/mL) or RANKL (200 ng/mL) in the bottom chamber, with quantification of the number of migrated cells. Error bars

are mean  $\pm$  SD. \* $P$  < 0.05, \*\* $P$  < 0.01, \*\*\* $P$  < 0.001, one-way ANOVA followed by Dunnett's post hoc test.  $n$  = 3 biological replicates. Scale bars, 20  $\mu$ m.

(C) Representative images of primary cultured OPs subjected to the migration assay (top chamber) with conditioned medium from MDA231 cells stimulated with RSPO1-4 or Norrin or RANKL at 200 ng/mL in the bottom chamber, with quantification of the number of migrated cells. Error bars are mean  $\pm$  SD. \* $P$  < 0.05, one-way ANOVA followed by Dunnett's post hoc test.  $n$  = 3 biological replicates. Scale bars, 20  $\mu$ m.

(D) Quantitative analysis of metastases in tumor-bearing mouse lung, kidney and brain by ex vivo bioluminescence (mice i.p. injected with conditioned medium of SCP46 cells treated with RSPO2 (200 ng/mL) or RANKL (200 ng/mL)). Error bars are mean  $\pm$  SD, one-way ANOVA Tukey's post hoc test.  $n$  = 6 per group.

#### **Supplemental Figure 4 LGR4-deficiency in breast cancer cells inhibits OP recruitment.**

(A) Kaplan-Meier analysis of bone metastasis-free survival according to *LGR5* mRNA expression data in 77 patients with BCa (acquired from microarray analysis GEO # GSE2603, *LGR5* low:  $n$  = 38, *LGR5* high:  $n$  = 39).  $P$  values were calculated by the log-rank test.

(B) MDA231 cells were transfected with the indicated siRNAs, and levels of *RANK* and *LGR4* mRNA were determined by qRT-PCR. \*\* $P$  < 0.01, \*\*\* $P$  < 0.001, one-way ANOVA with Dunnett's post hoc test.

(C) Representative images of primary cultured OPs subjected to the Transwell migration assay (top chamber) with different MDA231 cells following treatment with or without RANKL for 24 hours (bottom chamber) with quantification of the number of migrated cells. Error bars are mean  $\pm$  SD.  $**P < 0.01$ ,  $***P < 0.001$  by one-way ANOVA with Tukey's post hoc test.  $n = 3$  biological replicates. Scale bars, 20  $\mu\text{m}$ .

(D) Representative images of primary cultured OP cells (top chamber) subjected to the Transwell migration assay with MDA231 or BT549 cells (with or without *LGR4* knockdown or re-expression, as indicated) cultured in the bottom chamber, with quantification of the number of migrated cells. Error bars are mean  $\pm$  SD.  $**P < 0.01$ ,  $***P < 0.001$ , one-way ANOVA with Tukey's post hoc test.  $n = 3$  biological replicates, Scale bars, 20  $\mu\text{m}$ .

(E) Representative images of primary cultured OPs subjected to the Transwell migration assay (top chamber) with conditioned medium from indicated *LGR4* knockdown/half insufficient BCa cells (MDA231 and PyMT) in the bottom chamber. The migrated OPs were counted (right). Error bars are mean  $\pm$  SD.  $**P < 0.01$ ,  $***P < 0.001$ , unpaired two-tailed Student's *t* test. Scale bars, 20  $\mu\text{m}$ .  $n = 3$  for MDA231 cells and  $n = 4$  for primary cultured PyMT cells.

(F) Representative images of primary cultured OPs subjected to the Transwell migration assay (top chamber) with conditioned medium from indicated *LGR4* overexpressing BCa cells (MCF-7) in the bottom chamber, with quantification of the number of migrated cells. Error bars are mean  $\pm$  SD.  $**P < 0.01$ , unpaired two-tailed Student's *t* test.  $n = 5$  biological replicates. Scale bars, 20  $\mu\text{m}$ .

**Supplemental Figure 5 LGR4 regulates DKK1 expression in different breast cancer cells and DKK1 can recruit OPs and mildly induces osteoclast differentiation at high concentration.**

(A) RT-PCR showing the *LGR4* and *DKK1* expression level of *LGR4* knockdown in three different BCa cell lines.

(B) mRNA levels of *DKK1* and *LGR4* in SCP46 Ctrl and *LGR4* knockdown cells.  $n = 3$  biological replicates. Error bars are mean  $\pm$  SD. \*\*\* $P < 0.001$ , one-way ANOVA followed by Dunnett's post hoc test.

(C) Representative IHC images (DKK1) in BCa patients and quantitative analysis. Error bars are mean  $\pm$  SD, unpaired two-tailed Student's  $t$  test. Primary tumors ( $n = 50$ ), lymph node metastasis ( $n = 50$ ). Scale bars, 20  $\mu\text{m}$ .

(D) Correlation of *LGR4* expression with *DKK1* expression (GEO # GSE14244, GSE16554). Pearson's correlation analysis.

(E) Correlation of *LGR4* expression with *DKK1* expression in eight different BCa cell lines by qRT-PCR. Pearson's correlation analysis.

(F and G) (F) Representative images of RAW264.7 cells subjected to the Transwell migration assay (top chamber) with indicated concentrations of DKK1 added to the bottom chamber, with (G) quantification of the number of migrated cells. Error bars are mean  $\pm$  SD. \* $P < 0.05$ , \*\*\* $P < 0.001$ , one-way ANOVA followed by Dunnett's post hoc test.  $n = 3$  biological replicates. Scale bars, 20  $\mu\text{m}$ .

**(H and I)** **(H)** Representative TRAP staining images (left) of primary cultured OPs challenged with DKK1 and M-CSF (10 ng/mL) and RANKL (50 ng/mL). **(I)** The osteoclast numbers were counted. One-way ANOVA followed by Dunnett's post hoc test.  $n = 3$  biological replicates. Scale bars, 50  $\mu\text{m}$ .

**(J-M)** Conditioned medium from SCP6 cells was i.p. injected into nude mice for 21 days followed by SCP6-LUC i.c. injected (tumor-bearing mice). **(J)** Representative images of bioluminescent, radiographic, H&E, TRAP, IF double staining for RANK (green) and CD115 (red) in the tibias of mice and **(K-M)** quantitative analysis. Yellow arrows indicate osteolytic lesion areas, red dotted lines indicate tumor zone, white arrow indicate cells double positive for RANK and CD115. **(K)** *DKK1* mRNA level in SCP6 following overexpression of *DKK1*. Error bars are mean  $\pm$  SD.  $*P < 0.05$ ,  $***P < 0.001$ , **(K and M)** unpaired two-tailed Student's *t* test, **(L)** two-way ANOVA and log-rank test. **(K)**  $n = 3$  biological replicates, **(L and M)**  $n = 6$  biological replicates. Scale bars, 1 mm (micro-CT), 25  $\mu\text{m}$  (H&E), 50  $\mu\text{m}$  (TRAP), 10  $\mu\text{m}$ /5  $\mu\text{m}$  (left/right, IF).

**Supplemental Figure 6 Knocking down *DKK1* suppresses the capability of *LGR4* overexpressing cancer cells to attract OPs.**

**(A)** Representative images of primary cultured OP cells (top chamber) subjected to the Transwell migration assay. MDA231 cells with or without *LGR4* knocked down or exogenous expression of *DKK1* were placed in the bottom chamber, with quantification of the number of migrated cells. Error bars are mean  $\pm$  s.d.  $***P < 0.001$  by one-way ANOVA with Tukey's post hoc test.  $n = 3$  biological repeats. Scale bars, 20  $\mu\text{m}$ .

**(B)** Representative images of primary cultured OPs subjected to the Transwell migration assay with conditioned medium from MCF-7 cells transfected with *LGR4* overexpression plasmid and/or *siDKK1* in the bottom chamber, with quantification of the number of migrated cells. Error bars are mean  $\pm$  SD. \*\*\* $P < 0.001$ , one-way ANOVA with Tukey's post hoc test.  $n = 3$  biological replicates. Scale bars, 20  $\mu\text{m}$ .

**(C)** Serum human DKK1 protein levels were examined using a Human DKK1 ELISA Kit in tumor-free mice after 21 days of pre-treatment. Error bars are mean  $\pm$  SD. \* $P < 0.05$ , \*\* $P < 0.01$ , one-way ANOVA with LSD test.  $n = 6$  per group.

**(D)** *LGR4* and *DKK1* mRNA levels in SCP46 cells following knockdown of *LGR4* by two shRNAs or overexpression of *DKK1*. Error bars are mean  $\pm$  SD. \*\* $P < 0.01$ , \*\*\* $P < 0.001$ , one-way ANOVA with Tukey's post hoc test.  $n = 3$  biological replicates.

**(E)** Quantitative analysis of TRAP staining in the tibias of mice (refer to Figure 5A, tumor-free mice). Error bars are mean  $\pm$  SD. \*\* $P < 0.01$ , \*\*\* $P < 0.001$ , one-way ANOVA with Tukey's post hoc test.  $n = 6$  per group.

**(F)** IF double staining for RANK (green) and CD115 (red) in the tibias of mice (refer to Figure 5C, tumor-bearing mice). Error bars are mean  $\pm$  SD. \* $P < 0.05$ , \*\*\* $P < 0.001$ , one-way ANOVA with Tukey's post hoc test.  $n = 6$  per group.

**(G and H)** **(G)** Representative images of IF double staining for RANK (green) and CD115 (red) and TRAP staining in tibias of tumor-free mice. **(H)** Quantitative analysis of the bone parameters from tumor-free mice. White arrow indicate cells double positive for RANK and CD115. Error bars are mean  $\pm$  SD. \* $P < 0.05$ , \*\* $P < 0.01$ , \*\*\* $P < 0.001$ , one-way ANOVA Tukey's post hoc test.  $n = 5$  per group. Scale bars, 10  $\mu\text{m}/5$



$\mu\text{m}$  (left/right, IF), 50  $\mu\text{m}$  (TRAP). *DKK1* mRNA levels in SCP46 cells following knockdown of *DKK1*. Error bars are mean  $\pm$  SD. \*\*\*  $P < 0.001$ , unpaired two-tailed Student's  $t$  test.  $n = 3$  biological replicates.

**(I)** Quantitative analysis of TRAP in the tibias of mice (refer to Figure 6A, tumor-free mice). Error bars are mean  $\pm$  SD. \* $P < 0.05$ , \*\*\* $P < 0.001$ , one-way ANOVA with Tukey's post hoc test.  $n = 5$  per group.

**(J)** IF double staining for RANK (green) and CD115 (red) in the tibias of mice (refer to Figure 6C, tumor-bearing mice). Error bars are mean  $\pm$  SD. \*\* $P < 0.01$ , one-way ANOVA with Tukey's post hoc test.  $n = 6$  per group.

**Supplemental Figure 7 RSPO2 and RANKL regulates the expression of DKK1 in different types of BCa cells.**

**(A and B)** Correlation between serum level of RSPO2 and DKK1, RANKL and DKK1, and RANKL and RSOP2 in human benign lump patients ( $n = 9$ , **A**) and primary tumor patients ( $n = 28$ , **B**). Pearson's correlation analysis.

**(C)** mRNA levels of *DKK1* in different types of BCa cells stimulated with RSPO2 (200 ng/mL) or RANKL (200 ng/mL) for 6 hours. Error bars are mean  $\pm$  SD. \* $P < 0.05$ , \*\* $P < 0.01$ , \*\*\* $P < 0.001$ , unpaired two-tailed Student's  $t$  test.  $n = 5$  (MDA231 cells) and  $n = 3$  (other cell lines) biological replicates.

**(D)** *Dkk1* mRNA levels in 4T1 cells stimulated with RSPO2 (100 ng/mL) and RANKL (200 ng/mL) for 6 hours. Error bars are mean  $\pm$  SD. \* $P < 0.05$ , \*\*\* $P < 0.001$ , unpaired two-tailed Student's  $t$  test.  $n = 3$  biological replicates.

(E) DKK1 protein levels in MDA231 cells after treatment with RSPO2 (200 ng/mL) or RANKL (200 ng/mL) for 6 hours, as determined by ELISA assay. Error bars are mean  $\pm$  SD. \*\*\* $P < 0.001$ , unpaired two-tailed Student's  $t$  test.  $n = 3$  biological replicates.

(F) DKK1 protein levels in 4T1 cells when treated with RSPO2 (200 ng/mL) and RANKL (200 ng/mL) for 24 hours.

(G) Mouse DKK1 protein levels in the mouse serum of the pre-metastatic niche mouse model (refer to Fig 2, **B** and **C**). Error bars are mean  $\pm$  SD. \* $P < 0.05$ , one-way ANOVA followed by Dunnett's post hoc test.  $n = 5$  biological replicates.

(H) *RANK* mRNA levels in MDA231 cells following knockdown of *LGR4* or *RANK* or both. Error bars are mean  $\pm$  SD. \*\*\* $P < 0.001$ , one-way ANOVA with Tukey's post hoc test.  $n = 3$  biological replicates.

**Supplemental Figure 8 DKK1 regulates *Rnasek* expression via canonical WNT signaling for OP recruitment.**

(A) *Lrp5* or *Lrp6* mRNA levels in RAW264.7 cells following *Lrp5* or *Lrp6* knockdown, compared to control cells. Error bars are mean  $\pm$  SD. \*\*\* $P < 0.001$ , unpaired two-tailed Student's  $t$  test.  $n = 3$  biological replicates.

(B) Representative images of *Lrp5* or *Lrp6* knockdown RAW264.7 cells subjected to the Transwell migration assay and the migrated cells were counted and compared between the group with 200 ng/mL DKK1 as chemo-attractant and vehicle. Quantification of the number of migrated cells (right). Error bars are mean  $\pm$  SD. \*\*\* $P$

< 0.001, one-way ANOVA with Tukey's post hoc test.  $n = 3$  biological replicates. Scale bars, 20  $\mu\text{m}$ .

(C) Effects of TWS119 on OP viability for 24 hours. Error bars are mean  $\pm$  SD. unpaired two-tailed Student's  $t$  test.  $n = 3$  technical replicates.

(D) A heat map of RNA-Seq data indicating top 6 most upregulated genes ( $P \leq 0.01$ ) in primary cultured OPs treated with DKK1 (200 ng/mL) compared to the untreated control,  $n = 2$  per group. The color code scale represents  $Z$ -score values of the mean expression levels of genes

(E) Transcript levels of top 5 upregulated genes (refer to Supplemental Figure 8D) in primary cultured OPs treated with DKK1 (200 ng/mL) compared to the untreated control. Error bars are mean  $\pm$  SD.  $*P < 0.05$ , unpaired two-tailed Student's  $t$  test.  $n = 3$  biological replicates.

(F) *Rnasek* mRNA levels in RAW264.7 cells transfected with mouse *Rnasek* expression plasmid. Error bars are mean  $\pm$  SD.  $**P < 0.01$ , unpaired two-tailed Student's  $t$  test.  $n = 3$  biological replicates.

(G) *Rnasek* mRNA levels in RAW264.7 cells treated with two *siRnasek*. Error bars are mean  $\pm$  SD.  $***P < 0.001$ , one-way ANOVA followed by Dunnett's post hoc test.  $n = 3$  biological replicates.

**Supplemental Figure 9 LGR4 extracellular domain (ECD) protein treatment has little effect on lung metastasis in BCa bone metastasis mouse model.**

(A) Representative bioluminescent images of lung in LGR4-ECD treated mice (left, refer to Figure 9, **E-G**). Quantitative analysis of metastatic cells in lung by bioluminescence (right). Error bars are mean  $\pm$  SD, unpaired two-tailed Student's *t* test.  $n = 7$  per group.

(B) Representative images of IHC staining for human-DKK1 in tibias of tumor-bearing model from SCP46-LUC injected BALB/C nude mice (refer to Figure 9, **E-G**,  $n = 7$ ) or 4T1-LUC injected BALB/C mice (refer to Figure 2, **D-G**,  $n = 6$ ) with quantitative analysis of IHC staining. Error bars are mean  $\pm$  SD. \*\*\* $P < 0.001$ . Scale bars, 10  $\mu$ m.

**Supplemental Figure 10 Working model of RSPO2/RANKL-LGR4-DKK1 axis regulating osteoclastic pre-metastatic niche formation.**

RSPO2 and RANKL interact with their receptor LGR4 to modulate the expression of DKK1 through G $\alpha$ q and  $\beta$ -catenin signaling in BCa cells. In OPs, DKK1 functionally interacts with LRP5 and regulates the expression of *Rnasek* via canonical WNT signaling for OP recruitment.

## **Supplemental Methods**

### **Cell culture and reagents**

MDA231, MDA468, BT549, BT474, MCF7, KPL-4, 4T1 and RAW264.7 cell lines were obtained and authenticated by the Chinese Academy of Sciences Committee Type Culture Collection Cell Bank (Shanghai, China). The cell lines were cultured according to manufacturers' instructions. MDA231 subline SCP6, MDA231 subline SCP46 cells were derived by in vivo selection and single-cell subcloning from the parental MDA231 cell line (1, 2). SCP6, SCP46 and SKBR3 cells were kindly gifts from Dr. Guohong Hu at Chinese Academy of Sciences, Shanghai and cultured in DMEM containing 10% FBS. AT3 cells were a kindly gift from Dr. Xiang H.-F. Zhang at Baylor College of Medicine and cultured in RPMI-1640 with 10% FBS. Primary cultured OPs were isolated from the femur and tibia of 6-8-week-old mice and cultured as previously described (3), the primary OPs were cultured for 4 days with mouse M-CSF treatment (10 ng/mL) after which they were used to perform all cell experiments. Chemicals and recombinant proteins were purchased as follows: FH535 (HY-15721; MedChemExpress), TWS119 (HY-10590; MedChemExpress), SP600125 (S1460; Selleckchem), EHop-016 (S7319, Selleckchem), Cyclosporin A (S2286, Selleckchem), mouse RSPO2 (6946-RS-025/CF, R&D), human RANKL (6449-TEC-010/CF, R&D), mouse RANKL (462-TEC/CF, R&D), mouse M-CSF (416-ML-050, R&D), mouse DKK1 (5897-DK-010, R&D). Antibodies to c-Fms/CD115 (ab254357) and DKK1 (ab109416 for anti-human DKK1) were obtained from Abcam; antibodies against alpha Tubulin (GB11200) were obtained from Servicebio; anti-RNASEK Antibody (NBP1-

92338) was obtained from Novusbio; monoclonal antibodies against RANK (sc-374360 for tumor-free model), RANK (sc-390655 for tumor-bearing model) and DKK1 (sc-374574 for neutralizing DKK1) were obtained from Santa Cruz Biotechnology. Anti-LGR4 Antibody was a kind gift from Dr. Qingyun Liu at University of Texas Health Science Center, Houston, TX.

### **Micro-CT analysis**

Bone was scanned by in vivo X-ray microtomography (1272 Skyscan, Bruker) at 60 kV with a 0.25  $\mu\text{m}$  aluminum filter using a detection pixel size of 9  $\mu\text{m}$ , and the scanned images were reconstructed using Skyscan Recon software (Bruker) according to the manufacturer's instructions. The reconstructed images were analyzed using DataViewer software (Bruker) and CTVox software (Bruker). Osteolytic lesion area was analyzed using the ImageJ software (National Institutes of Health).

### **IHC staining**

Mouse bone tissues were fixed in 4% paraformaldehyde solution, decalcified in 0.5 M EDTA for 14 days at 4°C, with EDTA changed once a week. For antigen retrieval of paraffin (6  $\mu\text{m}$ ) sections, heating at 98°C water bath for 10 minutes was performed. The paraffin sections were treated with 3% H<sub>2</sub>O<sub>2</sub> for 10 minutes then permeabilized with 0.1% Triton X-100 (Sigma) and blocked in 2% goat serum, then incubated with LGR4, DKK1 or RNASEK antibody at 4°C overnight. Secondary antibody incubation was performed at room temperature for 1 hour, followed by detection with ABC-HRP Kit

(Vector, PK-4001) and DAB substrate (Vector, SK-4100). IHC images were obtained with a Leica microscope (Leica, DM4000b). DAB positive score analysis was performed using ImageJ software with IHC Profiler. To preclude nonspecific signals, a negative control lacking primary Ab was added with each batch of slides. During preparation and analysis of bone tissues, investigators were blinded to specific groups.

### **Osteoclast differentiation assay**

For DKK1-induced osteoclast differentiation analysis, we isolated OPs from 6-8-week-old WT mice femur and tibia bones as previously described (3). OPs were seeded into 96-well plates at a concentration of 8000 cells per well in triplicate. Cells were stimulated with osteoclast differentiation medium (containing 50 ng/mL RANKL and 10 ng/mL M-CSF) and indicated concentrations of DKK1 for 4-6 days until differentiated. Osteoclasts were fixed and stained using the TRAP staining kit (Sigma-Aldrich, 387A-1KT). TRAP positive cell numbers were quantified and normalized to control.

### **Gene knockdown preparation and transfection**

The non-targeting control shRNA, two *LGR4* shRNA sequences, non-targeting control siRNA, two human *LGR4* siRNA oligos were described in our previous report (4). Human *RANK* siRNA oligos (siRANK#1 (5); siRANK#2, 5'-UCUCUGCCAGCUAGAAAACUU-3') were obtained from GenePharma (Shanghai, China). Human *DKK1* shRNA sequence were used as previously described (6). Human

*Gag* siRNA oligos (*siGag*#1, 5'-GAAGGUGUCUGCUUUUGAGTT-3'; *siGag*#2, 5'-GGAGUACAAUCUGGUCUAAUU-3'). Human *DKK1* siRNA oligos were also described in a previous publication (7). Mouse *Lrp5* siRNA oligos (*siLrp5*, 5'-GGACGGACUCCGAGACCAAdTdT-3'), mouse *Lrp6* siRNA oligos (*siLrp6*, 5'-AUCUCAACCAGAUGUGUAUUU-3') (8) and mouse *Rnasek* siRNA oligos (*siRnasek*#1, 5'-UCCUCAGAACAUAUACAACCUGU-3'; *siRnasek*#2, 5'-UGUCCAUUCUGCUGUGUAAU-3') were obtained from Biotend (Shanghai, China). Breast cancer cells were transfected with siRNAs using Lipofectamine 2000 (Thermo Fisher, 11668019), and the OPs were transfected with plasmids or siRNAs using FuGENE® HD Transfection Reagent (Promega, E2311).

### **Gene expression analysis**

For RT-PCR or qRT-PCR analysis, total RNA was extracted from cells using TRIzol reagent (MaGen, R4801-02). cDNA was generated by using PrimeScript™ RT Reagent Kit (Takara, Code No. RR037A) following the manufacturer's protocol. Primers are provided in Supplemental Table 7.

### **Proteomic profiling of cell cultured medium**

MDA468 WT and *LGR4* CRISPR KO cells (CRISPR guide sequences were as follows:

*sgLGR4*#1: 5'-CTGCGACGGCGACCGTCGGG-3'; *sgLGR4*#2: 5'-

GGGCTGACGGCCGTGCCCGA-3'; *sgLGR4*#3: 5'-

TACCCAGTGAAGCCATTCGA-3') were cultured with serum-free media 24 h before



the growth media were collected. The media was centrifuged at 16,000 g for 10 min to remove cells and debris. The supernatant was subsequently digested with trypsin. The resulting peptides were analyzed on a Q Exactive Plus mass spectrometer and quantified by the label-free method. The values shown in the Supplemental Table 5 are in fraction of total (FOT) ( $\text{iBAQ}/\text{total iBAQ} \times 10^6$ ).

### **Identification of secreted proteins**

We extracted the secreted proteins from the Uniprot database using the following two methods. First, the proteins annotated as secreted for the subcellular localization were selected. Then, the proteins from the Gene Ontology (GO) terms of proteinaceous extracellular matrix (GO: 0005578) and extracellular space (GO: 0005615) as well as their child nodes were added as well. In total, 2,090 secreted proteins were obtained (listed in Supplemental Table 3).

### **CCK-8 assay**

The CCK-8 assay was performed to examine cell viability. OPs (20000/well) were seeded in 96-well plates with OPs culture medium (100  $\mu\text{l}$ ), three replicate wells per group. Cells were treated with or without TWS119 in the medium as indicated. Finally, 10  $\mu\text{l}$  of CCK-8 reagent were added to each well and incubated for 1 - 3 hours. Then the absorbance value (OD) was measured.

### **RNA-Seq and bioinformatics analysis**

Primary cultured OPs isolated from two mice were seeded in 6-well plates in 2 ml OP culture medium per well. The cells were stimulated with or without DKK1 (200 ng/mL) for 3 hours. Total cellular RNA was extracted with TRIzol (MaGen, R4801-02). The concentration and purity of the RNA samples were examined using an Agilent 2100 Bioanalyzer and a NanoDrop 2000 Spectrophotometer. The edgeR package (<http://www.bioconductor.org>) was used to analyze the differential gene expression of the two groups. Genes with adjusted  $P < 0.05$  and absolute  $\log_2$  [fold change]  $> 1$  were considered to be significantly differentially expressed. The RNA-Seq data have been deposited in the NCBI Gene Expression Omnibus database under the accession number GSE184248.

### **Immunofluorescence (IF) staining**

Mouse bone tissues were fixed in 4% paraformaldehyde solution, decalcified in 0.5 M EDTA for 14 days at 4°C, with EDTA changed once a week. Protease K (sigma) was used for antigen retrieval of paraffin sections (6  $\mu$ m). The paraffin sections were permeabilized with 0.1% Triton X-100 (Sigma) and blocked in 2% goat serum, then incubated with CD115 (also known as c-Fms/CSF-1R) and RANK antibody at 4°C overnight. Incubation with fluorescently labeled secondary antibody was performed at room temperature for 1 hour followed by mounting medium with DAPI (Invitrogen, P36962). Images were obtained with Leica microscope (Leica, DM4000b). The number of positively stained cells were counted in the specimen per mouse. To preclude nonspecific signals, a negative control lacking primary antibody was included with each

batch of slides. During preparation and analysis of bone tissues, investigators were blinded to specific groups.

### **Serum ELISA analysis**

47 serum samples of benign breast lump, primary BCa, and bone metastasis BCa patients were obtained from Changzheng Hospital of The Second Military Medical University with informed patient consent and the approval by the Ethics Committee. Serum samples were pre-treated according to the manufacturer's instructions and analyzed with human DKK1 ELISA kit (SEA741Hu, Cloud-Clone), human RSPO2 ELISA kit (SEA172Hu, Cloud-Clone) and human RANKL ELISA kit (SEA855Hu, Cloud-Clone) according to the standard protocol.

### **Reference**

1. Kang Y, et al. A multigenic program mediating breast cancer metastasis to bone. *Cancer cell*. 2003;3(6):537-49.
2. Minn AJ, et al. Genes that mediate breast cancer metastasis to lung. *Nature*. 2005;436(7050):518-24.
3. Takeshita S, et al. Identification and characterization of the new osteoclast progenitor with macrophage phenotypes being able to differentiate into mature osteoclasts. *Journal of bone and mineral research : the official journal of the American Society for Bone and Mineral Research*. 2000;15(8):1477-88.
4. Yue Z, et al. LGR4 modulates breast cancer initiation, metastasis, and cancer stem cells. *FASEB journal : official publication of the Federation of American Societies for Experimental Biology*. 2018;32(5):2422-37.
5. Luo J, et al. LGR4 is a receptor for RANKL and negatively regulates osteoclast differentiation and bone resorption. *Nat Med*. 2016;22(5):539-46.
6. Zhuang X, et al. Differential effects on lung and bone metastasis of breast cancer by Wnt signalling inhibitor DKK1. *Nature cell biology*. 2017;19(10):1274-85.
7. Hall CL, et al. p21CIP-1/WAF-1 induction is required to inhibit prostate cancer growth elicited by deficient expression of the Wnt inhibitor Dickkopf-1. *Cancer Res*. 2010;70(23):9916-26.

8. Wei W, et al. The LDL receptor-related protein LRP6 mediates internalization and lethality of anthrax toxin. *Cell*. 2006;124(6):1141-54.

Supplemental Figure 1

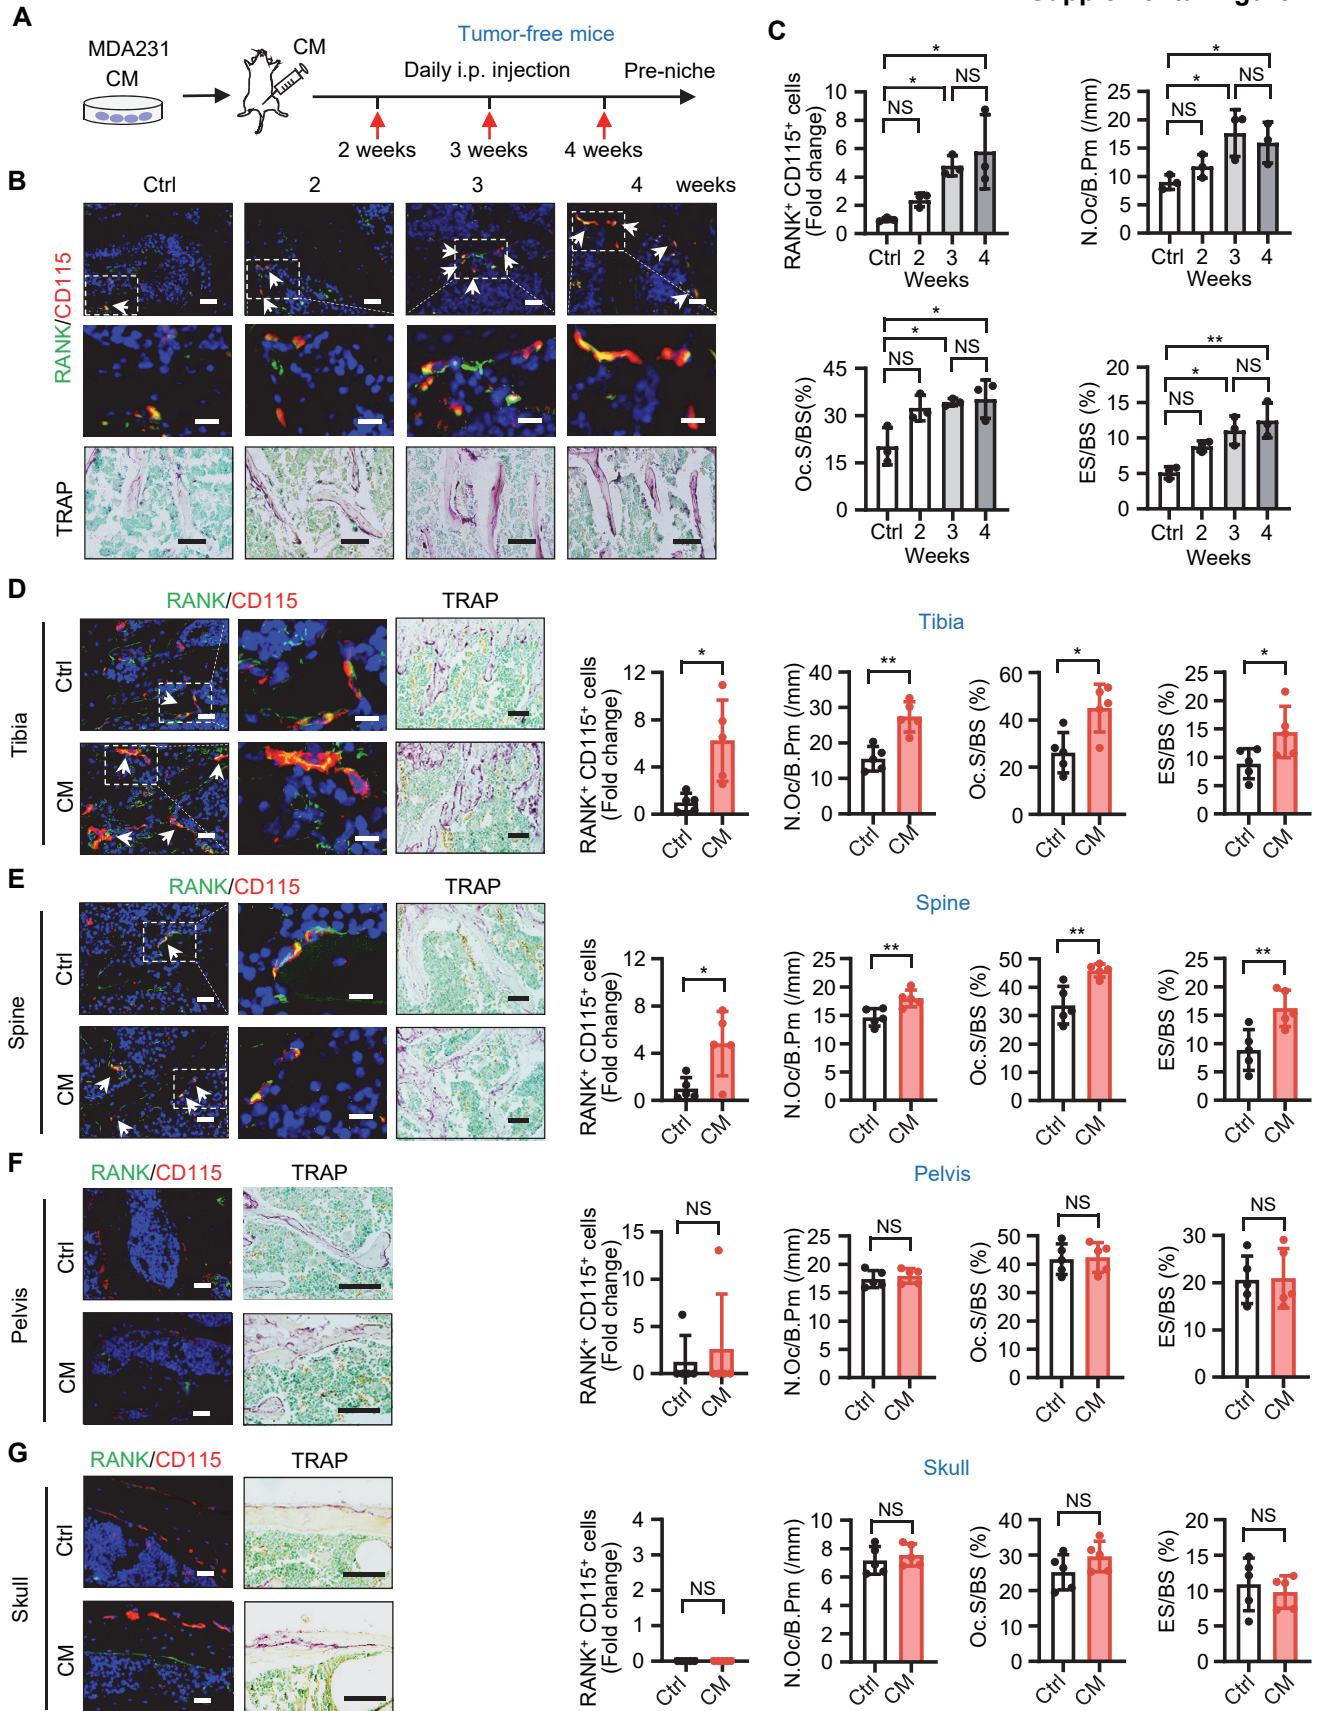

Supplemental Figure 2

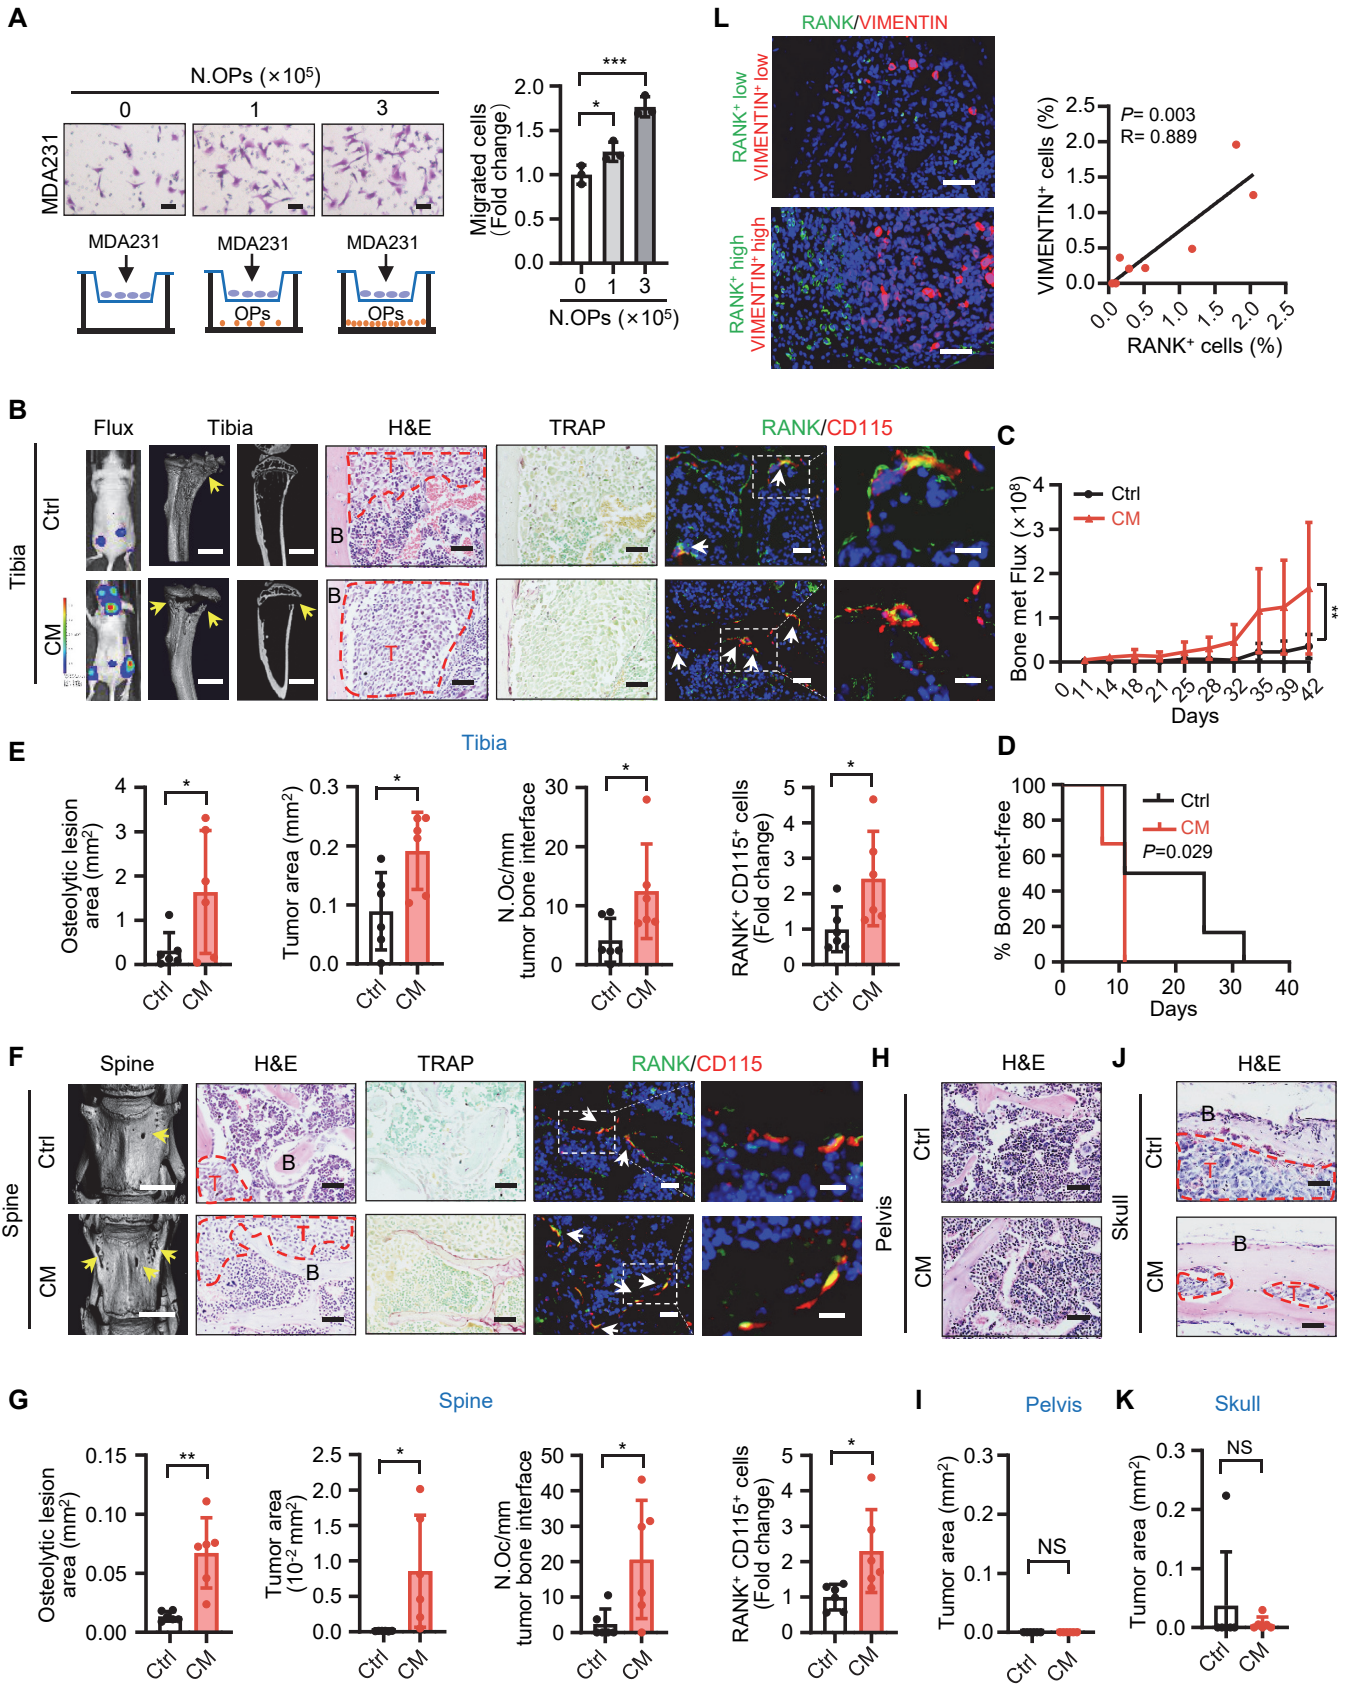

Supplemental Figure 3

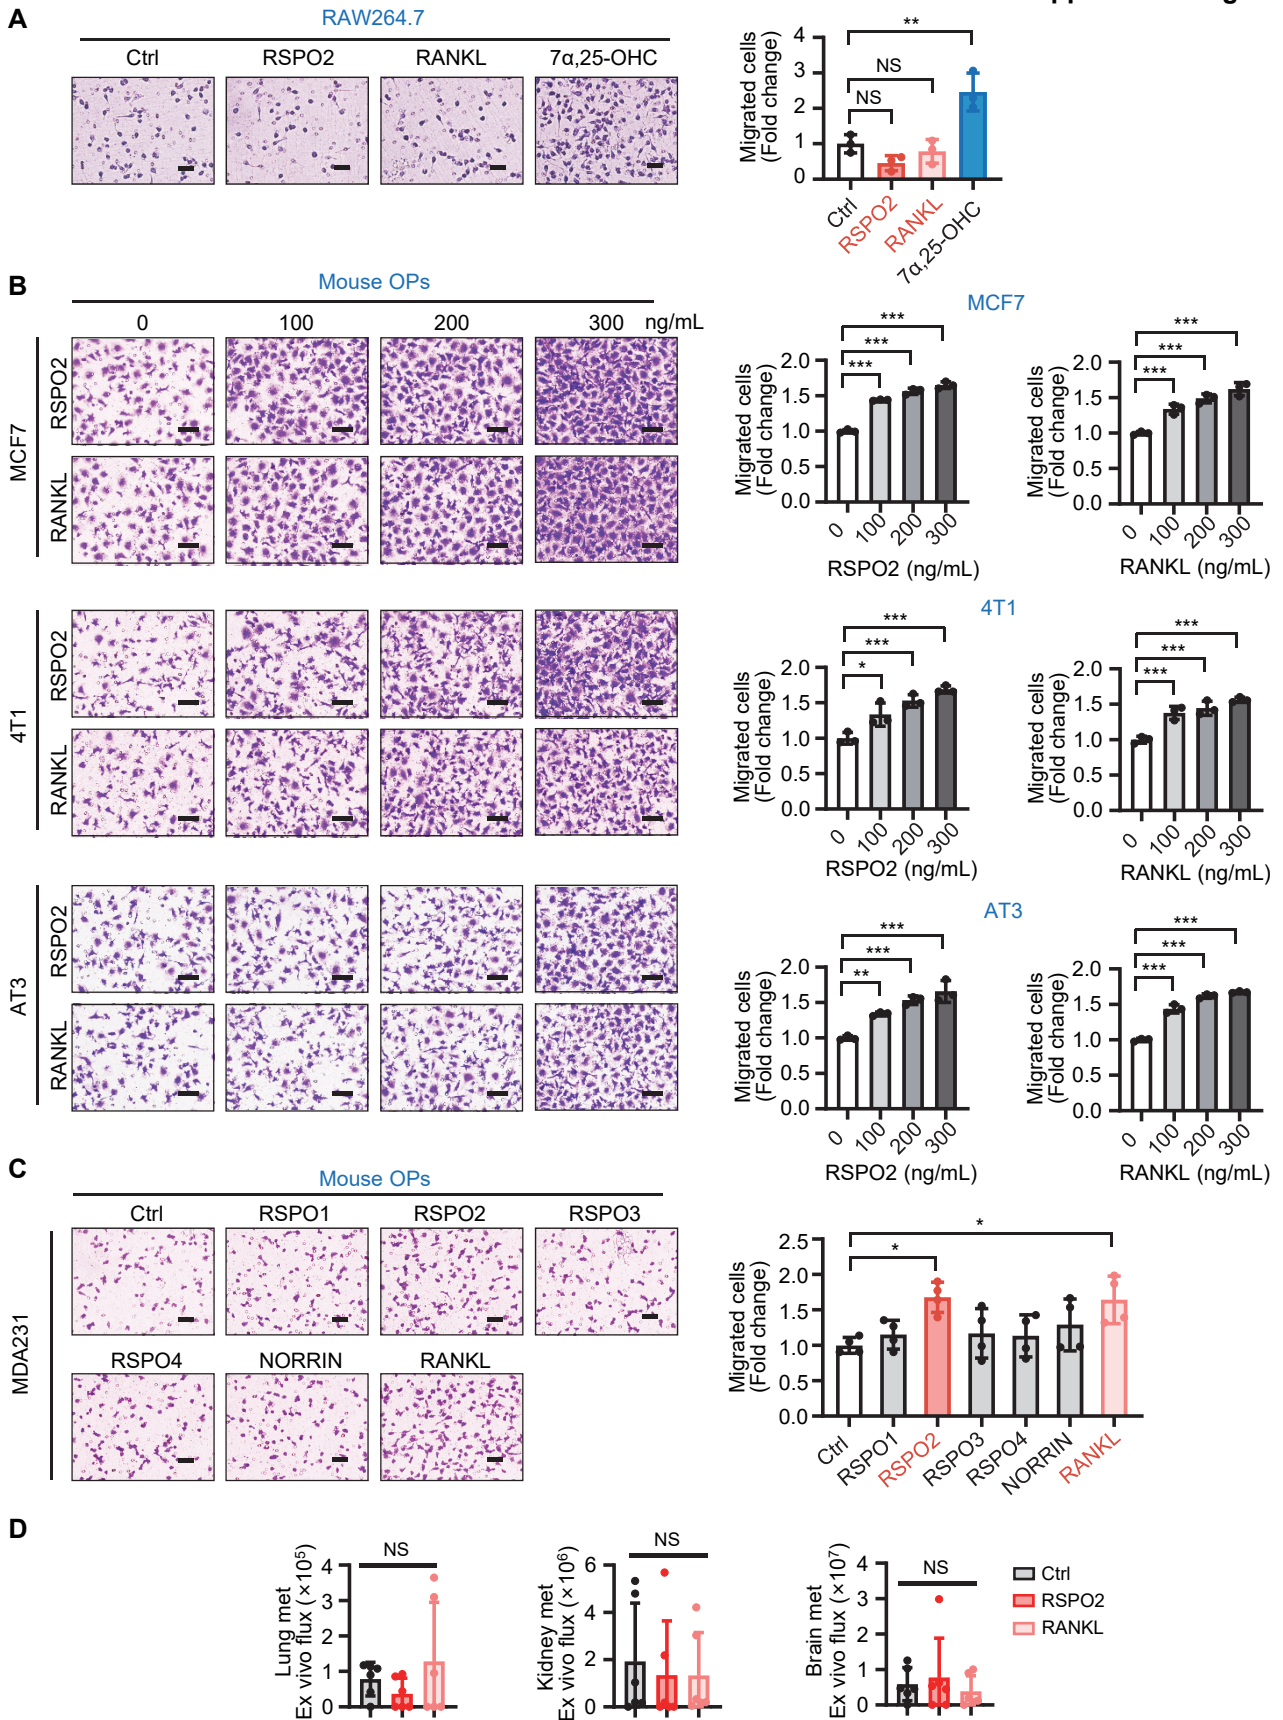

Supplemental Figure 4

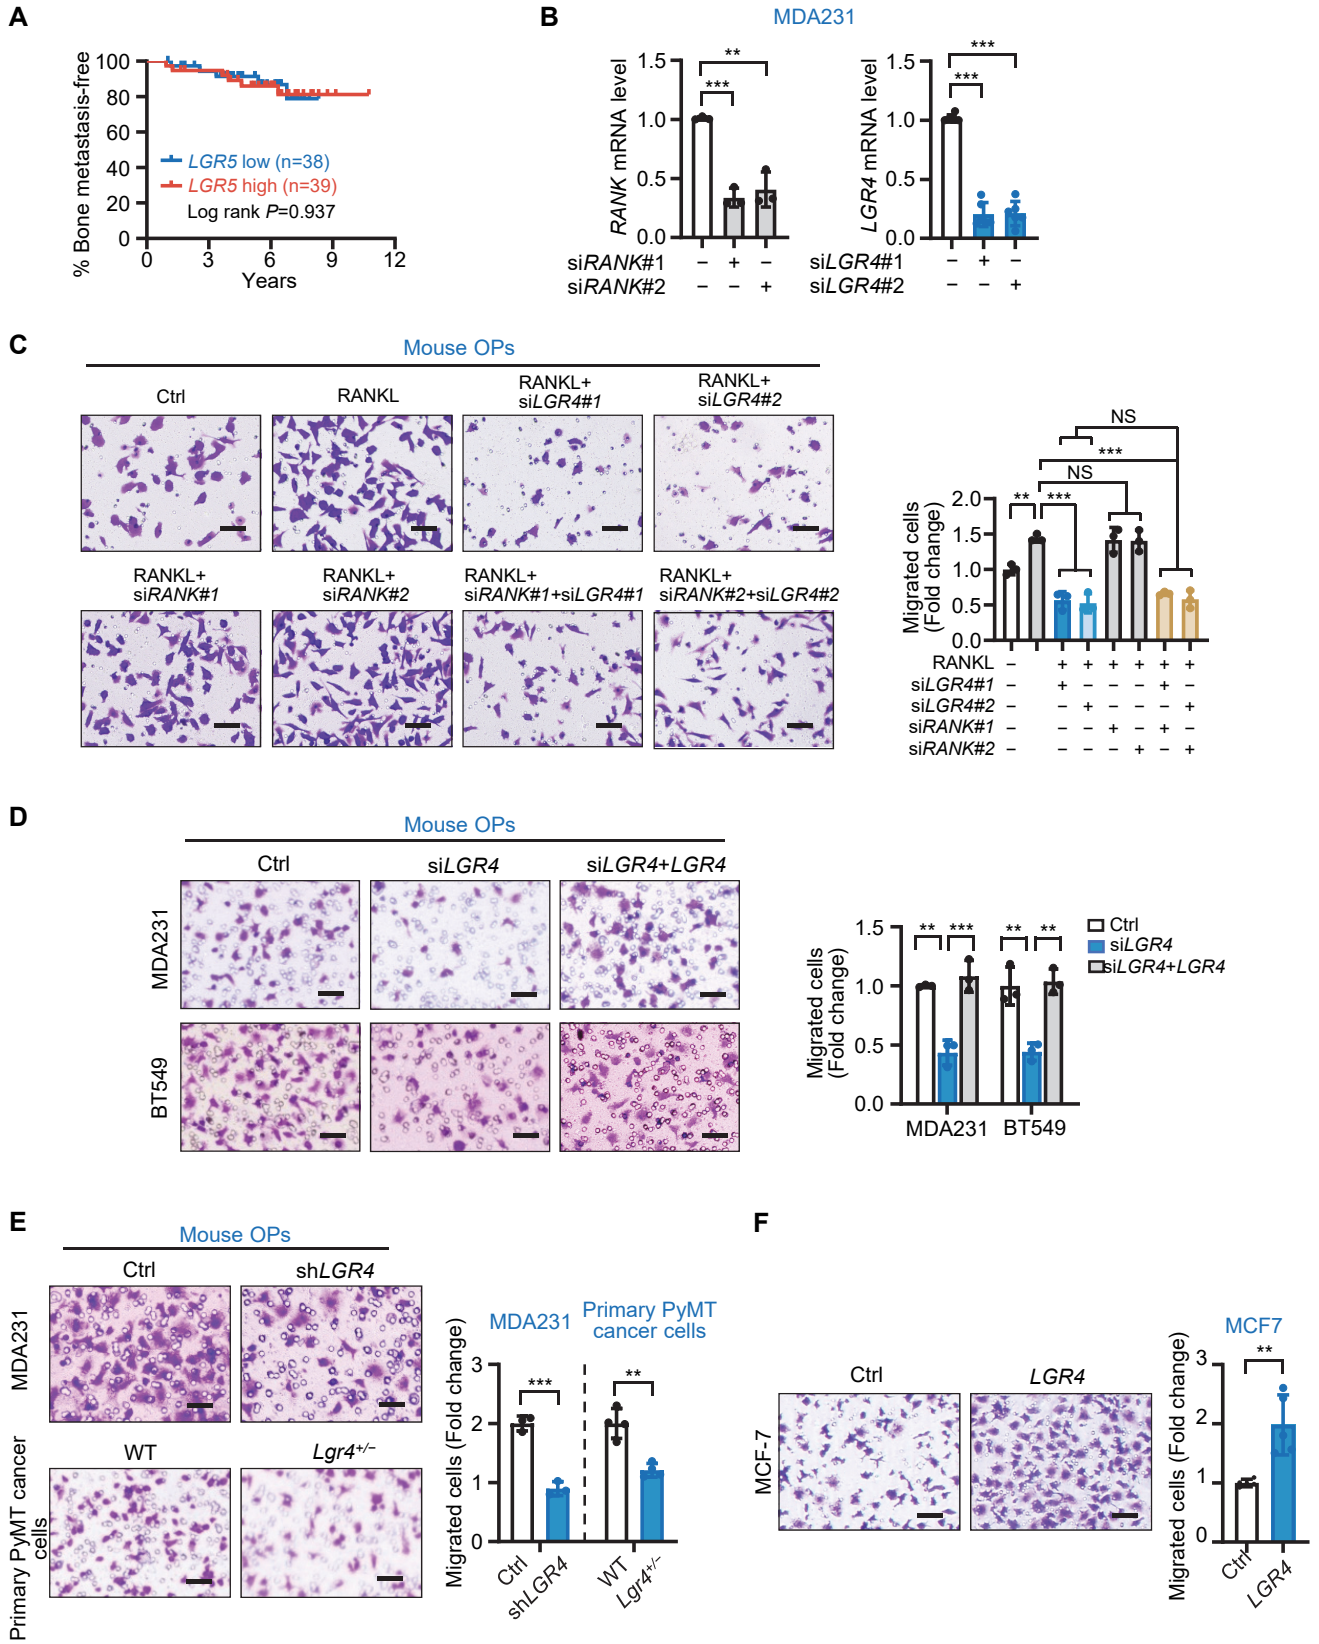



Supplemental Figure 5

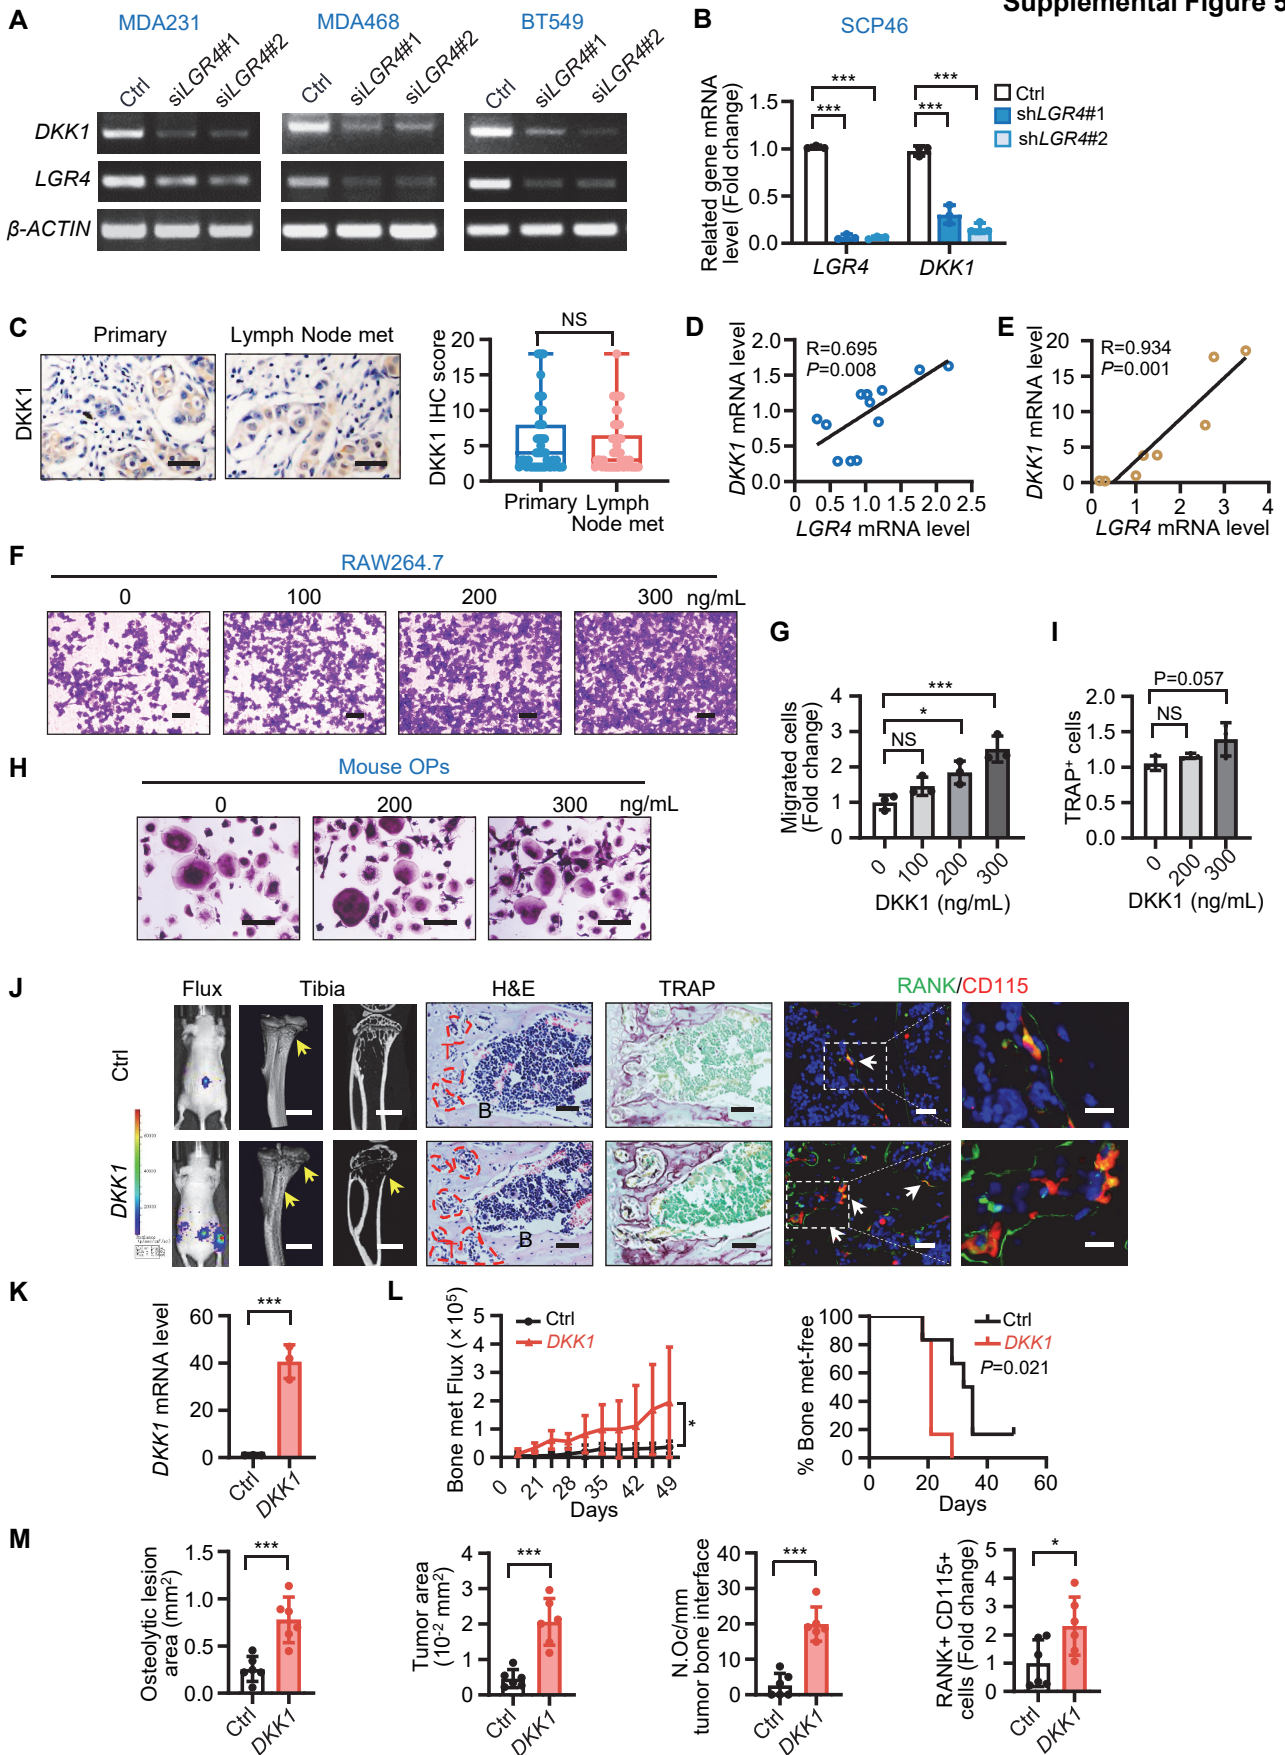

Supplemental Figure 6

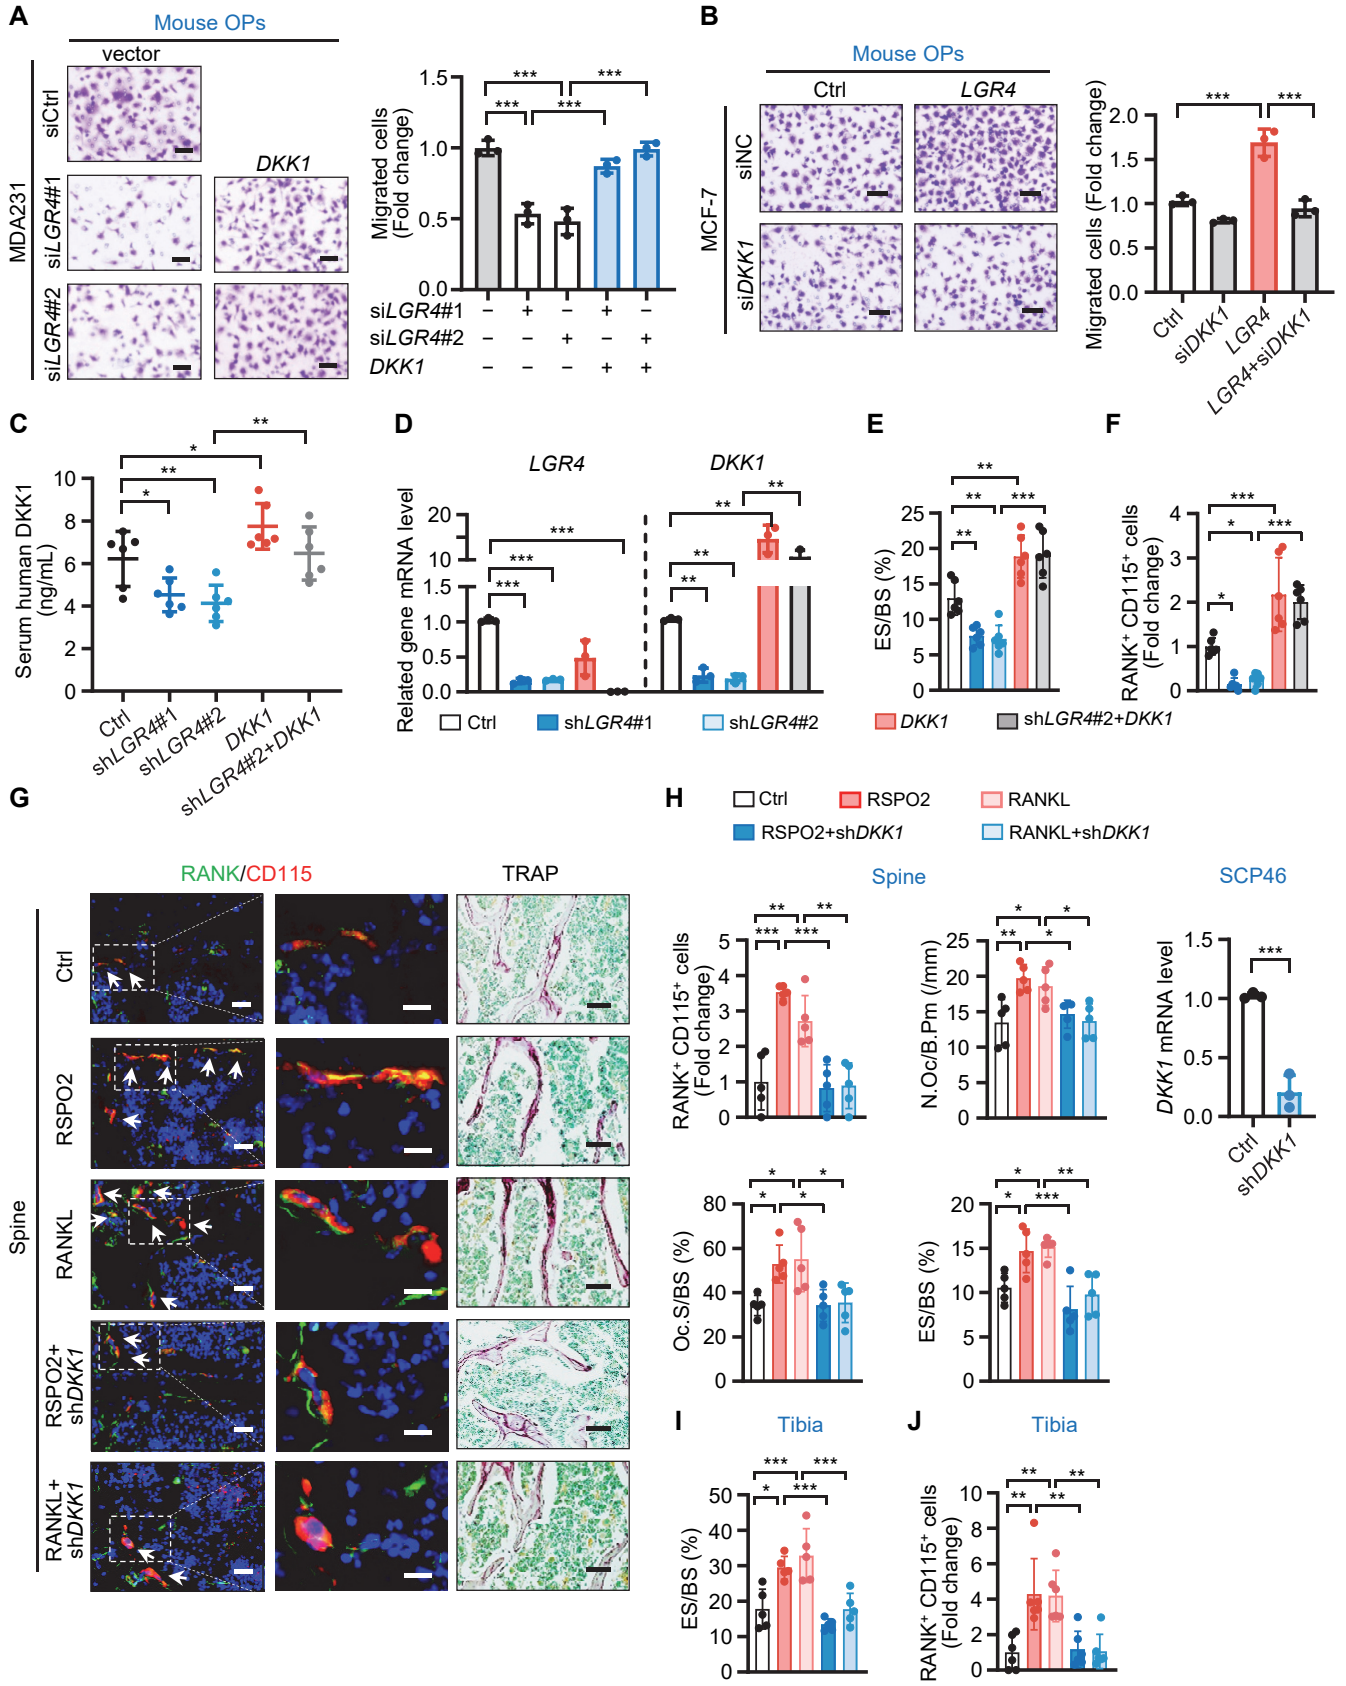

Supplemental Figure 7

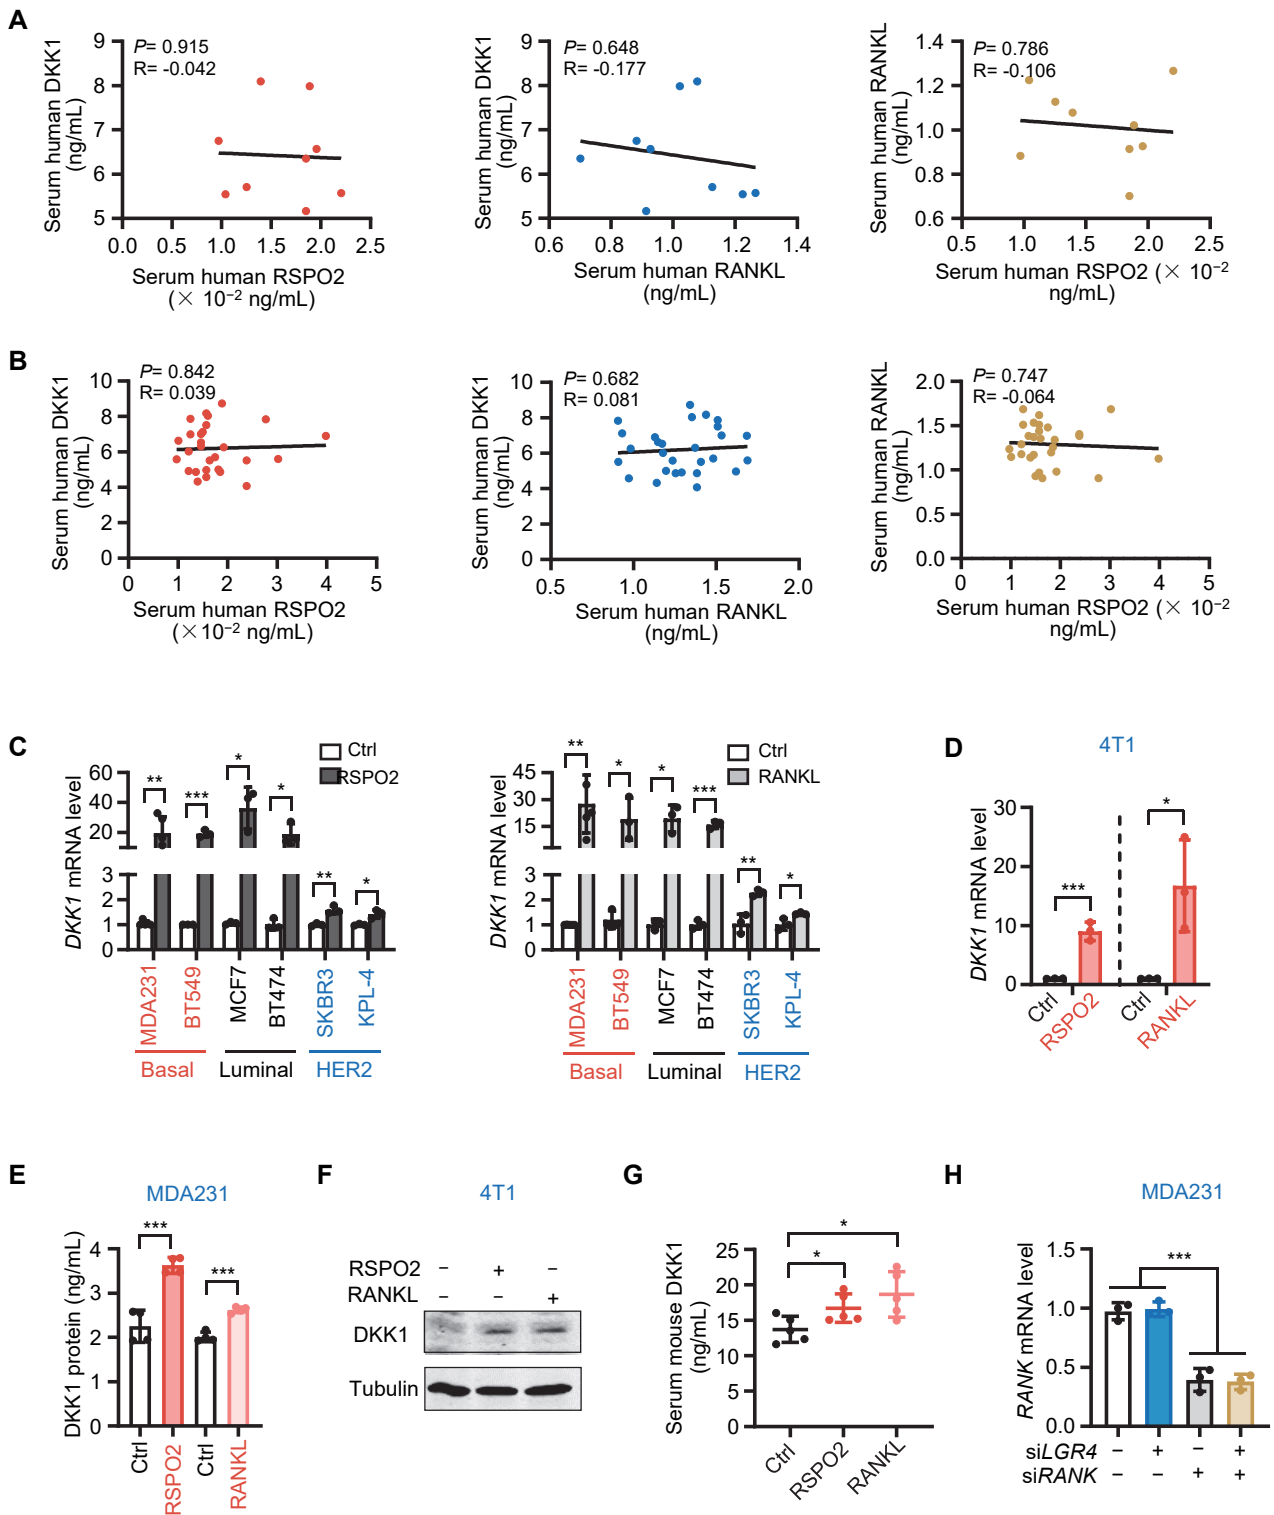

Supplemental Figure 8

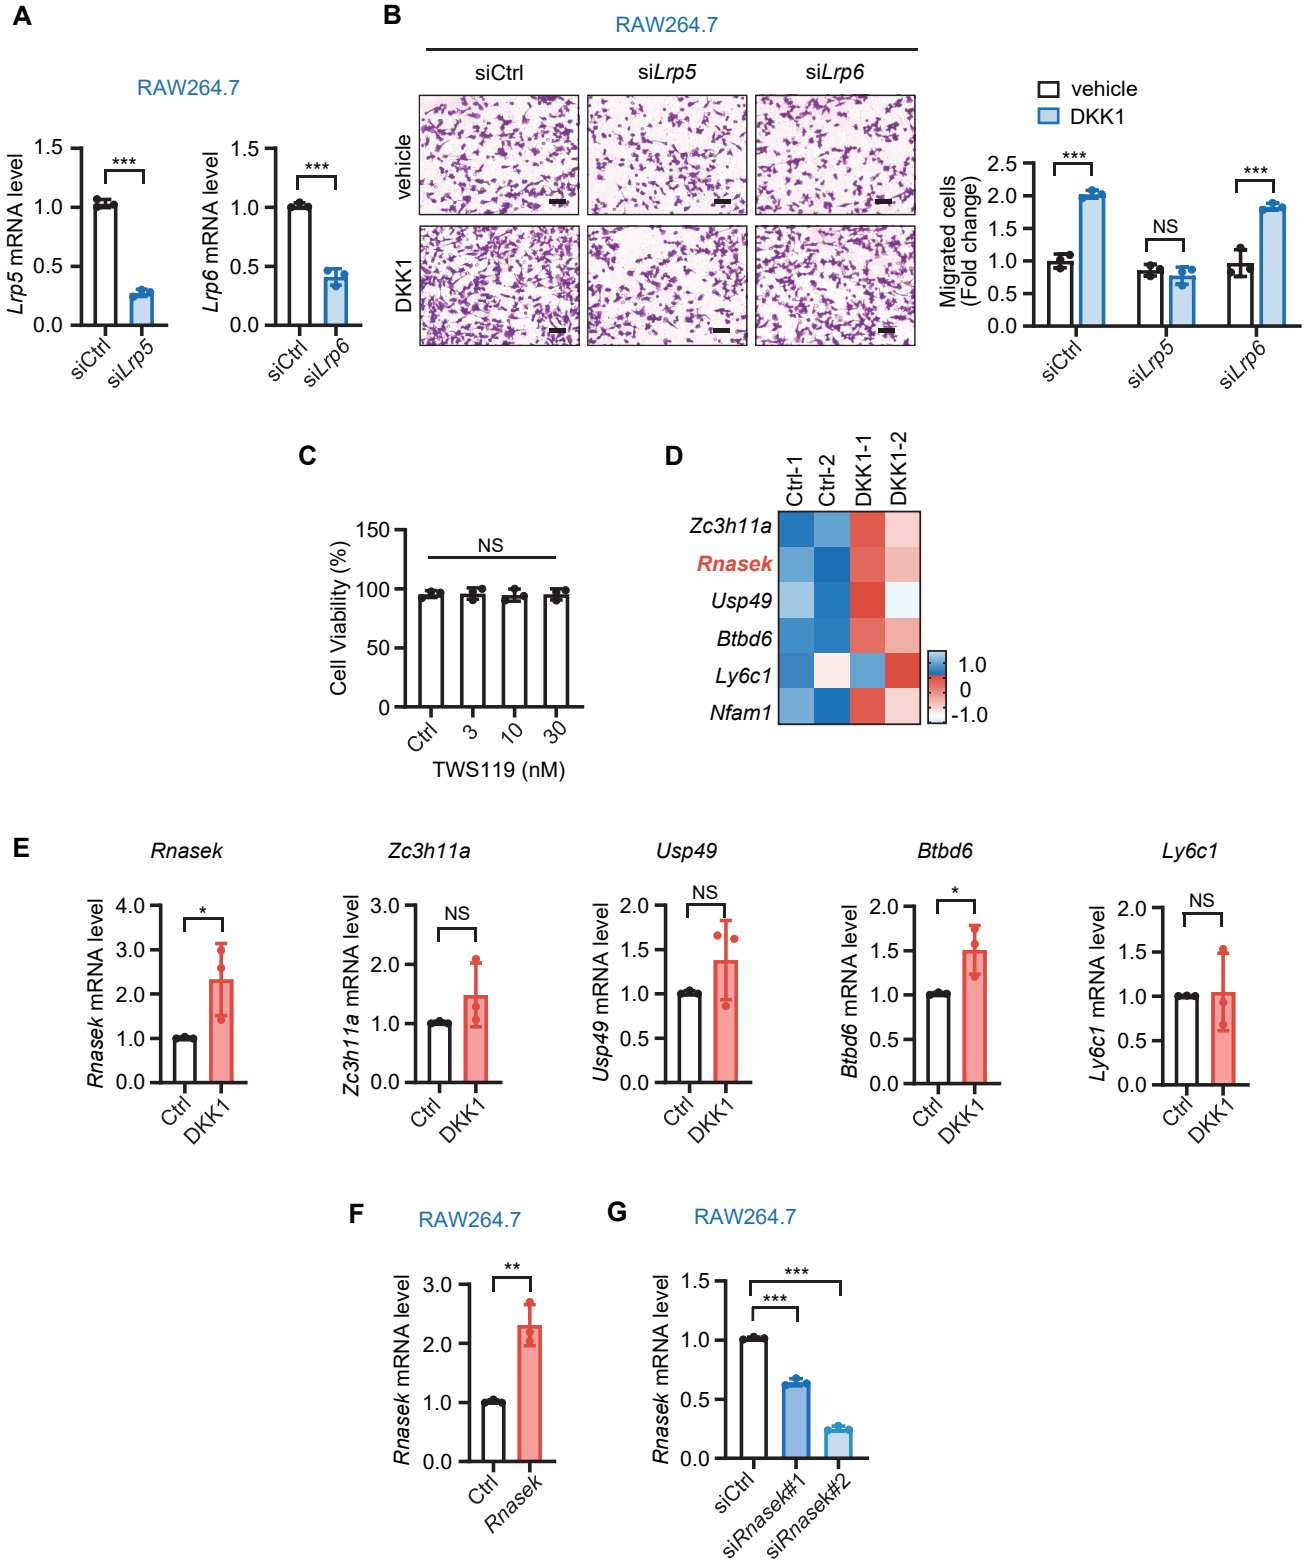

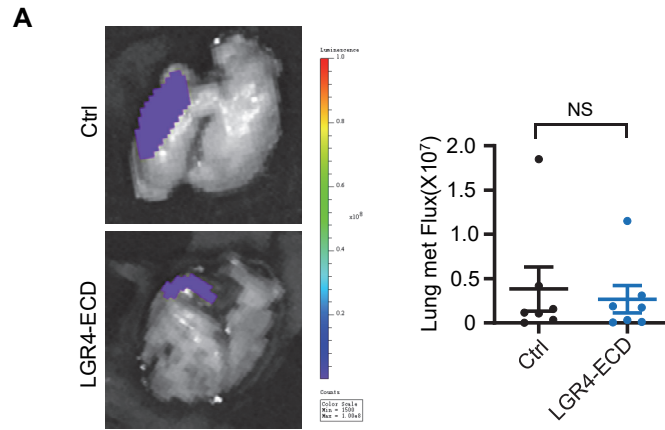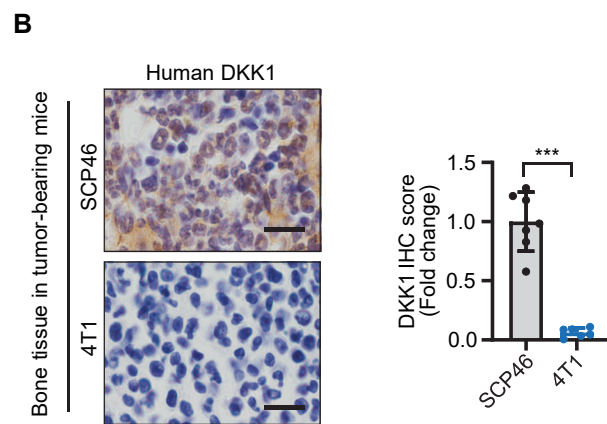

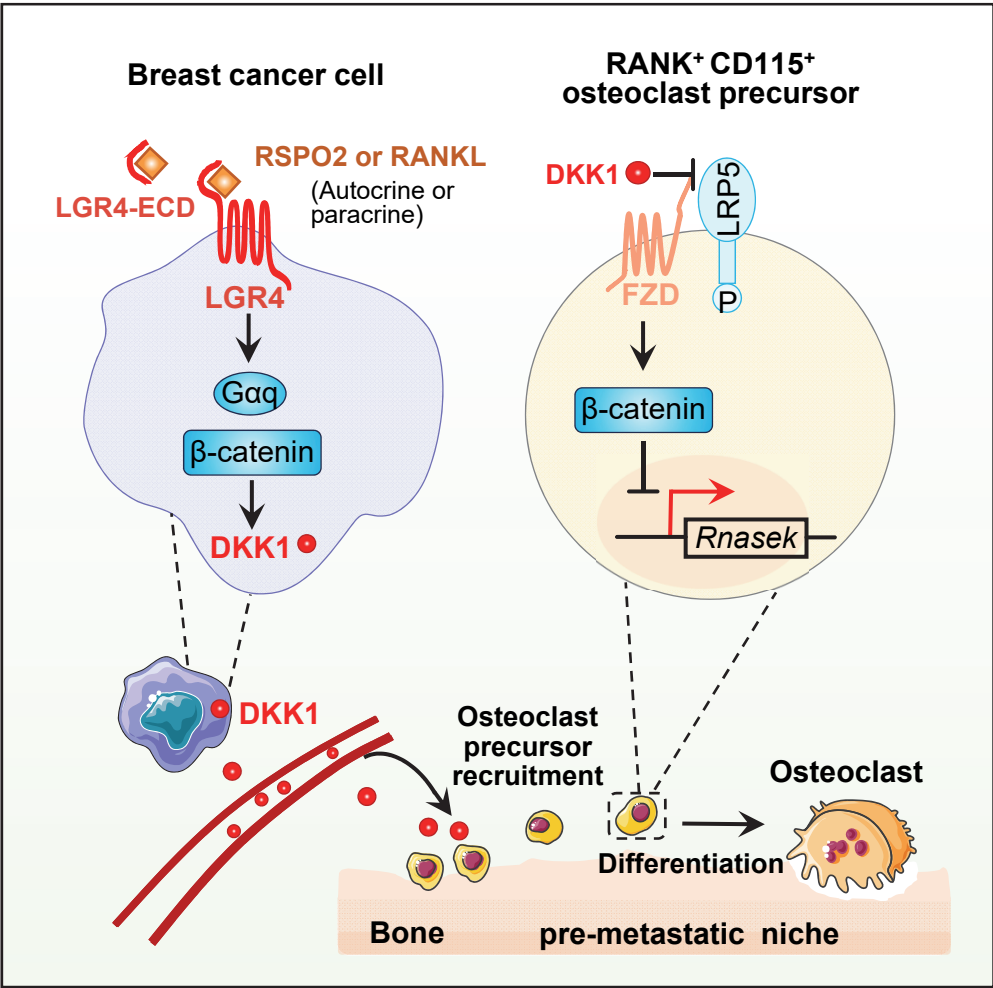

Supplementary Table 1. 86 GPCR agonists/ligands refer to Figure 1A

| S/N | Agonist/Ligand                          | Receptor                                                  | S/N | Agonist/Ligand                   | Receptor                        | S/N | Agonist/Ligand             | Receptor                      |
|-----|-----------------------------------------|-----------------------------------------------------------|-----|----------------------------------|---------------------------------|-----|----------------------------|-------------------------------|
| 1   | Aripiprazole                            | 5-HT1A Receptor                                           | 30  | SKF-82958 (Hydrobromide)         | Dopamine Receptor D1/D5         | 59  | NS-304                     | IP Receptor                   |
| 2   | Vilazodone (Hydrochloride)              | 5-HT1A Receptor                                           | 31  | rac-Rotigotine (Hydrochloride)   | Dopamine Receptor D2            | 60  | RSPO1                      | LGR4/LGR5/LGR6                |
| 3   | Almotriptan (Malate)                    | 5-HT1B/5-HT1D Receptor                                    | 32  | Neuromedin N                     | Dopamine Receptor D2            | 61  | RSPO2                      | LGR4/LGR5/LGR6                |
| 4   | BRL 54443                               | 5-HT1E/5-HT1F Receptor                                    | 33  | Pramipexole (Dihydrochloride)    | Dopamine Receptor D2S/D2L/D3/D4 | 62  | RSPO3                      | LGR4/LGR5/LGR6                |
| 5   | lumateperone (Tosylate)                 | 5-HT2A Receptor                                           | 34  | ST-836 (Hydrochloride)           | Dopamine Receptor               | 63  | RSPO4                      | LGR4/LGR5/LGR6                |
| 6   | Lorcaserin (Hydrochloride)              | 5-HT2C Receptor                                           | 35  | Dexpramipexole (Dihydrochloride) | Dopamine Receptor               | 64  | NORRIN                     | LGR4/LGR5/LGR6                |
| 7   | CP-809101 (Hydrochloride)               | 5-HT2C/5-HT2B/5-HT2A Receptor                             | 36  | Evatanepag                       | EP2 Receptor                    | 65  | VU0357017 (Hydrochloride)  | M1/M2/M5 mAChR                |
| 8   | Tegaserod (Maleate)                     | 5-HT4 Receptor                                            | 37  | Taprenepag                       | EP2 Receptor                    | 66  | Arecoline (Hydrobromide)   | M3 mAChR                      |
| 9   | GR79236                                 | Adenosine Receptor A1                                     | 38  | Misoprostol                      | EP2/EP4 Receptor                | 67  | VU0152100                  | M4 mAChR                      |
| 10  | CGS 21680 (Hydrochloride)               | Adenosine Receptor A2A                                    | 39  | PGE2                             | EP1/EP2/EP3/EP4 Receptor        | 68  | Ramelteon                  | Melatonin Receptor 1/2        |
| 11  | 2-CI-IB-MECA                            | Adenosine Receptor A3                                     | 40  | Anamorelin                       | Ghrelin Receptor                | 69  | Ro 67-7476                 | mGluR1                        |
| 12  | AdipoRon                                | Adiponectin Receptor 1/2                                  | 41  | Betamethasone                    | Glucocorticoid Receptor         | 70  | VU0364770                  | mGluR4                        |
| 13  | Scopine (Hydrochloride)                 | Adrenergic Receptor $\alpha$ 1                            | 42  | Dexamethasone (Acetate)          | Glucocorticoid Receptor         | 71  | VU0357121                  | mGluR5                        |
| 14  | (R)-(-)-Phenylephrine (Hydrochloride)   | Adrenergic Receptor $\alpha$ 1A/ $\alpha$ 1B/ $\alpha$ 1D | 43  | Gonadorelin (Acetate)            | GnRH                            | 72  | ML314                      | Neurotensin Receptor 1        |
| 15  | UK 14304 (Tartrate)                     | Adrenergic Receptor $\alpha$ 2A/ $\alpha$ 2B/ $\alpha$ 2C | 44  | Leuprolide (Acetate)             | GnRH                            | 73  | Orexin 2 Receptor Agonist  | Orexin Receptor 2             |
| 16  | Dexmedetomidine (Hydrochloride)         | Adrenergic Receptor $\alpha$ 2A                           | 45  | Kynurenic Acid                   | GPR35                           | 74  | UDP                        | P2Y11/P2Y12 Receptor          |
| 17  | Guanfacine (Hydrochloride)              | Adrenergic Receptor $\alpha$ 2A                           | 46  | AMG 837 (Calcium Hydrate)        | GPR40                           | 75  | Diquafosol (Tetrasodium)   | P2Y2 Receptor                 |
| 18  | Isoprenaline (Hydrochloride)            | Adrenergic Receptor $\beta$ (non-selective)               | 47  | Sodium butyrate                  | GPR41/GPR43                     | 76  | ADP                        | P2Y6 Receptor                 |
| 19  | Norepinephrine (Bitartrate Monohydrate) | Adrenergic Receptor $\beta$ 1                             | 48  | Kisspeptin-10                    | GPR54                           | 77  | UDPN                       | P2Y14 Receptor                |
| 20  | Ritodrine (Hydrochloride)               | Adrenergic Receptor $\beta$ 2                             | 49  | OGERIN                           | GPR68                           | 78  | TRAP-6                     | Protease-Activated Receptor 1 |
| 21  | Salbutamol (Hemisulfate)                | Adrenergic Receptor $\beta$ 2(short-acting)               | 50  | MBX-2982                         | GPR119                          | 79  | AC-55541                   | Protease-Activated Receptor 2 |
| 22  | Indacaterol (Maleate)                   | Adrenergic Receptor $\beta$ 2(ultra-long-acting)          | 51  | GSK137647A                       | GPR120                          | 80  | RANKL                      | RANK Receptor/LGR4            |
| 23  | Mirabegron                              | Adrenergic Receptor $\beta$ 3                             | 52  | Type IV Collagen                 | GPR126                          | 81  | Siponimod                  | S1P1/S1P5 Receptor            |
| 24  | WIN 55,212-2 (Mesylate)                 | CB1/CB2 Receptor                                          | 53  | L-Lactic Acid                    | GPR132                          | 82  | Ozanimod                   | S1P1/S1P5 Receptor            |
| 25  | Org 27569                               | CB1 Receptor                                              | 54  | 7 $\alpha$ ,25-OHC               | GPR183                          | 83  | INT-777                    | TGR5                          |
| 26  | MDA 19                                  | CB2 Receptor                                              | 55  | Loratadine                       | Histamine Receptor H1           | 84  | ADL-5859                   | $\delta$ -Opioid Receptor     |
| 27  | JWH-133                                 | CB2 Receptor                                              | 56  | Histamine (Phosphate)            | Histamine Receptor H1/H2/H3/H4  | 85  | Loperamide (Hydrochloride) | $\mu$ -Opioid Receptor        |
| 28  | SRT3190                                 | CXCR2                                                     | 57  | Moxonidine                       | Imidazoline Receptor 1 (I1-R)   | 86  | Trimebutine (Maleate)      | $\mu$ -Opioid Receptor        |
| 29  | Fenoldopam (Mesylate)                   | Dopamine Receptor D1                                      | 58  | MRE-269                          | IP Receptor                     |     |                            |                               |

Supplementary Table 2. *LGR4* and *DKK1* expression value from GEO datasets of human breast cancer (MDA231) bone-tropic sublines (13 sublines)

| Cell line<br>Gene | Parental<br>MDA231 | Weakly<br>met<br>SCP21 | Weakly<br>met<br>SCP6 | Weakly<br>Bone met<br>2296 | Weakly<br>Bone met<br>2293 | Weakly<br>Bone met<br>2295 | Strongly<br>Bone<br>met1833 | Bone met<br>SCP14 | Bone met<br>SCP25 | Strongly<br>Bone met<br>2269 | Strongly<br>Bone met<br>2268 | Strongly<br>Bone met<br>2274 | Bone met<br>SCP46 |
|-------------------|--------------------|------------------------|-----------------------|----------------------------|----------------------------|----------------------------|-----------------------------|-------------------|-------------------|------------------------------|------------------------------|------------------------------|-------------------|
| LGR4              | 1.061641           | 0.316673               | 0.448029              | 0.607448                   | 0.792261                   | 0.877346                   | 0.938359                    | 1.017849          | 1.024692          | 1.182555                     | 1.233339                     | 1.764152                     | 2.170768          |
| DKK1              | 1.120088           | 0.883666               | 0.804397              | 0.286618                   | 0.290838                   | 0.296921                   | 1.232686                    | 1.226288          | 1.232839          | 0.846338                     | 1.287753                     | 1.579341                     | 1.630795          |

GEO DataSets: GSE14244 and GSE16554

Supplementary Table 4. Fold changes of 14 secreted WNT target genes in *LGR4* knock down SCP46 cells compared to shCtrl cells by qRT-PCR

| Secreted Wnt<br>targets | mRNA expression ratio  |              |
|-------------------------|------------------------|--------------|
|                         | sh <i>LGR4</i> /shCtrl | STDEV        |
| <b><i>DKK1</i></b>      | <b>0.340</b>           | <b>0.031</b> |
| <i>DKK4</i>             | 0.634                  | 0.132        |
| <i>ADAM10</i>           | 1.149                  | 0.188        |
| <i>BMP4</i>             | 1.164                  | 0.144        |
| <i>EDN1</i>             | 1.057                  | 0.458        |
| <i>FGF18</i>            | 0.572                  | 0.101        |
| <i>FGFBP1</i>           | 0.667                  | 0.189        |
| <i>GAST</i>             | 0.671                  | 0.034        |
| <i>LAMC2</i>            | 0.686                  | 0.066        |
| <i>MMP7</i>             | 1.017                  | 0.084        |
| <i>PLAU</i>             | 0.290                  | 0.009        |
| <i>S100A4</i>           | 0.427                  | 0.011        |
| <i>TNC</i>              | 0.469                  | 0.092        |
| <i>VEGFA</i>            | 0.276                  | 0.027        |

Supplementary Table 5. 14 secreted Wnt target protein fraction of total (FOT) value in *LGR4* WT MDA468 cell medium compared to KO cell medium by proteomic profiling analysis

| Secreted Wnt targets | FOT value      |                |
|----------------------|----------------|----------------|
|                      | <i>LGR4</i> WT | <i>LGR4</i> KO |
| <b><i>DKK1</i></b>   | <b>3.2</b>     | <b>ND</b>      |
| <i>DKK4</i>          | ND             | ND             |
| <i>ADAM10</i>        | 2.7            | 1.8            |
| <i>BMP4</i>          | ND             | ND             |
| <i>EDN1</i>          | ND             | ND             |
| <i>FGF18</i>         | ND             | ND             |
| <i>FGFBP1</i>        | 109.4          | 85.0           |
| <i>GAST</i>          | ND             | ND             |
| <i>LAMC2</i>         | ND             | 0.2            |
| <i>MMP7</i>          | ND             | ND             |
| <i>PLAU</i>          | ND             | ND             |
| <i>S100A4</i>        | 36.2           | 90.9           |
| <i>TNC</i>           | ND             | 0.3            |
| <i>VEGFA</i>         | ND             | ND             |

ND= not detected.

Supplementary Table 6. *LGR4* and *DKK1* expression (normalized to the expression in MCF7) in 8 different BCa cell lines by qRT-PCR

| Cell line<br>Gene | T47D    | MDA-MB-453 | MCF7 | MDA-MB-436 | BT474   | HS578T  | BT549    | MDA-MB-231 |
|-------------------|---------|------------|------|------------|---------|---------|----------|------------|
| LGR4              | 0.18154 | 0.29918    | 1    | 1.16724    | 1.48433 | 2.56422 | 2.7644   | 3.48207    |
| DKK1              | 0.2789  | 0.23749    | 1    | 3.82553    | 3.86976 | 8.11773 | 17.74853 | 18.63091   |



Supplementary Table 7. Primer sequences used in this study

| Primer Name                  |   | Primer sequence           |
|------------------------------|---|---------------------------|
| Human <i>LGR4</i>            | F | ACCTGGAGACCTTAGACTTG      |
|                              | R | CCACGAATGACTAGGGAATG      |
| Human <i>RANK</i>            | F | GGGAAAGCACTCACAGCTAATTTG  |
|                              | R | GCACTGGCTTAAACTGTCATTCTCC |
| Human <i>DKK1</i>            | F | CCTTGAACCTCGTTCTCAATTCC   |
|                              | R | CAATGGTCTGGTACTTATTCCCG   |
| Human <i>ADAM10</i>          | F | ATGGGAGGTCAGTATGGGAATC    |
|                              | R | ACTGCTCTTTTGGCACGCT       |
| Human <i>BMP4</i>            | F | ATGATTCTGGTAACCGAATGC     |
|                              | R | CCCCGTCTCAGGTATCAAACCT    |
| Human <i>DKK4</i>            | F | ACGGACTGCAATACCAGAAAAG    |
|                              | R | CGTTCACACAGAGTGTCCCAG     |
| Human <i>END1</i>            | F | CTACTTCTGCCACCTGGACATC    |
|                              | R | TCACGGTCTGTTGCCTTTGTGG    |
| Human <i>FGF18</i>           | F | ACGATGTGAGCCGTAAGCAGCT    |
|                              | R | ACCGAAGGTGTCTGTCTCCACT    |
| Human <i>FGFBP1</i>          | F | TGGCAAACCAGAGGAAGACTGC    |
|                              | R | GGAACCCGTTCTCTTTTGACCTC   |
| Human <i>GAST</i>            | F | ATGCAGCGACTATGTGTGTATG    |
|                              | R | GCCCCTGTACCTAAGGGTG       |
| Human <i>LAMC2</i>           | F | GACAAACTGGTAATGGATTCCGC   |
|                              | R | TTCTCTGTGCCGGTAAAAGCC     |
| Human <i>MMP7</i>            | F | TCGGAGGAGATGCTCACTTCGA    |
|                              | R | GGATCAGAGGAATGTCCCATAACC  |
| Human <i>PLAU</i>            | F | GGGAATGGTCACTTTTACCGAG    |
|                              | R | GGGCATGGTACGTTTGCTG       |
| Human <i>S100A4</i>          | F | CAGAACTAAAGGAGCTGCTGACC   |
|                              | R | CTTGGAAGTCCACCTCGTTGTC    |
| Human <i>TNC</i>             | F | ATGTCCTCCTGACAGCCGAGAA    |
|                              | R | AGTCACGGTGAGGTTTTCCAGC    |
| Human <i>VEGFA</i>           | F | AGGGCAGAATCATCACGAAGT     |
|                              | R | AGGGTCTCGATTGGATGGCA      |
| Human $\beta$ - <i>ACTIN</i> | F | GTACGCCAACACAGTGCTG       |
|                              | R | CGTCATACTCCTGCTTGCTG      |
| Mouse <i>Lgr4</i>            | F | AAGATAACAGCCCCAAGAC       |
|                              | R | AGGCAGTGATGAACAAGACG      |
| Mouse <i>Dkk1</i>            | F | CAGTGCCACCTTGAACTCAGT     |
|                              | R | CCGCCCTCATAGAGAACTCC      |
| Mouse <i>Rnasek</i>          | F | TGTTAATTGAGGACGTTCCCTTC   |
|                              | R | GCGGCGATGAAACAGTTGTA      |
| Mouse <i>Btdbd6</i>          | F | GCCCACAAGTATGTCTTGGCT     |
|                              | R | CAGGCTCCACATCGGGAATG      |
| Mouse <i>Ly6c1</i>           | F | GCAGTGCTACGAGTGCTATGG     |
|                              | R | ACTGACGGGTCTTTAGTTTCCTT   |
| Mouse <i>Usp49</i>           | F | GGAGAATCTACGCTTGTGACCAG   |
|                              | R | GGAGGACCTGAGGTAGTCTGTA    |
| Mouse <i>Z3ch11a</i>         | F | ATGCCTAATCAGGGAGAAGACT    |
|                              | R | CACCTGTCGAAAACAACGACC     |
| Mouse <i>Gapdh</i>           | F | TGGCCTCCGTGTTCTAC         |
|                              | R | GAGTTGCTGTTGAAGTCGCA      |
